# Supplementary material for: Purine nucleosides as selective inhibitors of butyrylcholinesterase – a multidisciplinary study
Source: Royal Society of Chemistry journal article supplement (doi:10.1039/d4ob01657b), 2024-11-21
Supplement: d4ob01657b1.pdf [file d4ob01657b1.pdf]

Supporting information

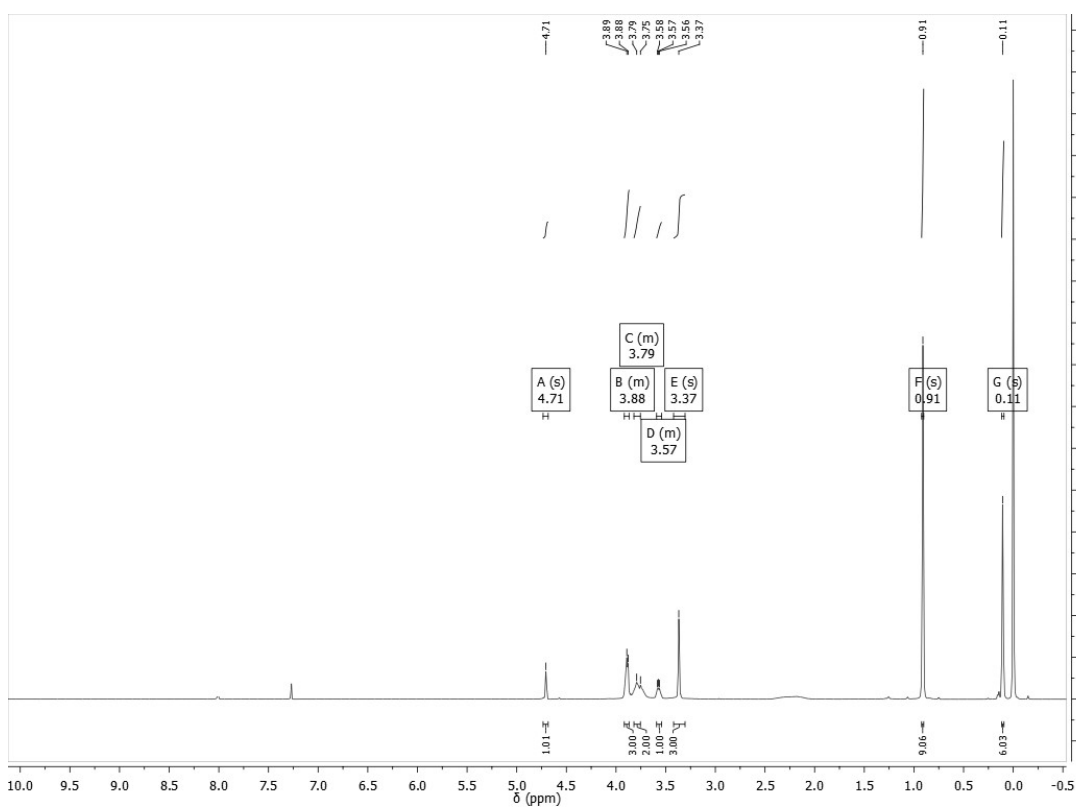

Figure S1. <sup>1</sup>H-NMR spectra of compound **10**

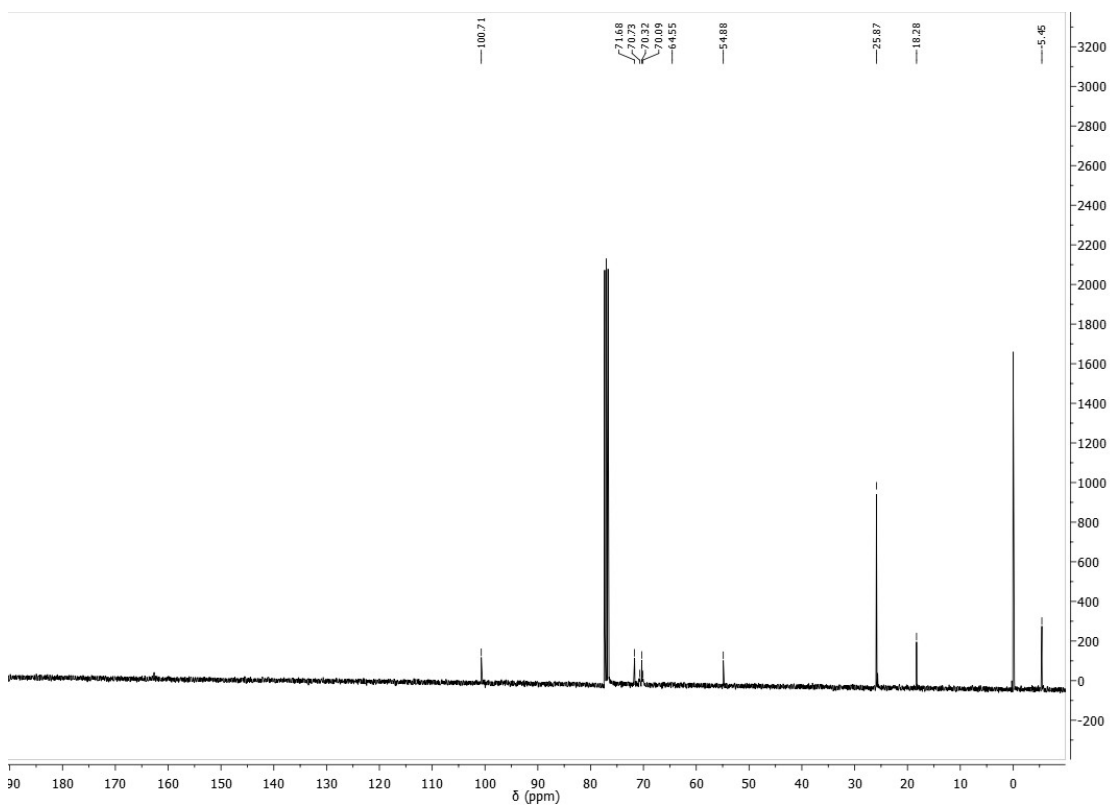

Figure S2. <sup>13</sup>C-NMR spectra of compound **10**

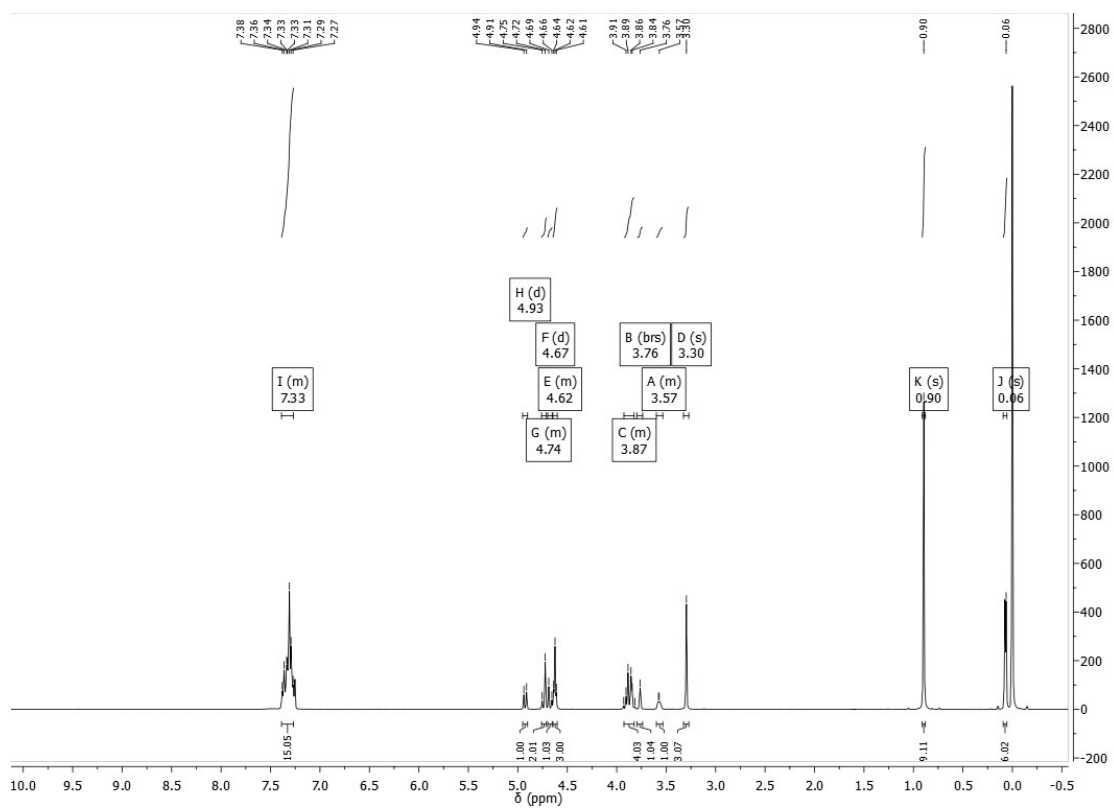

Figure S3.  $^1\text{H}$ -NMR spectra of compound **11**

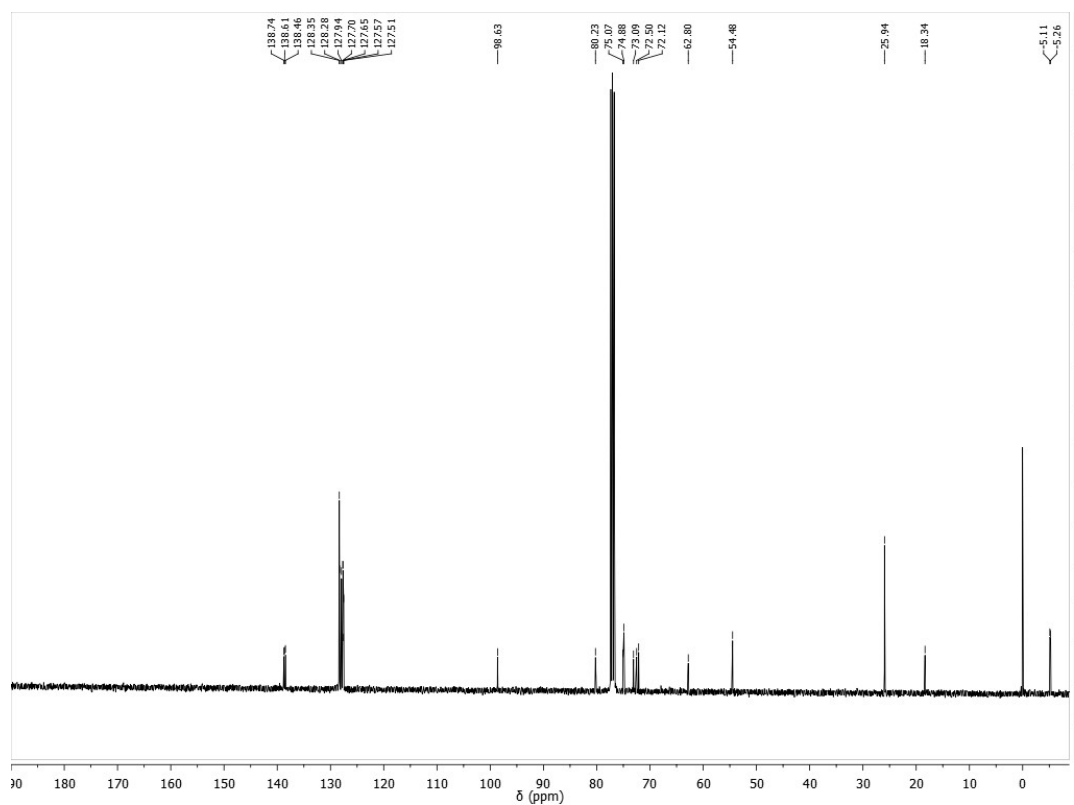

Figure S4.  $^{13}\text{C}$ -NMR spectra of compound **11**

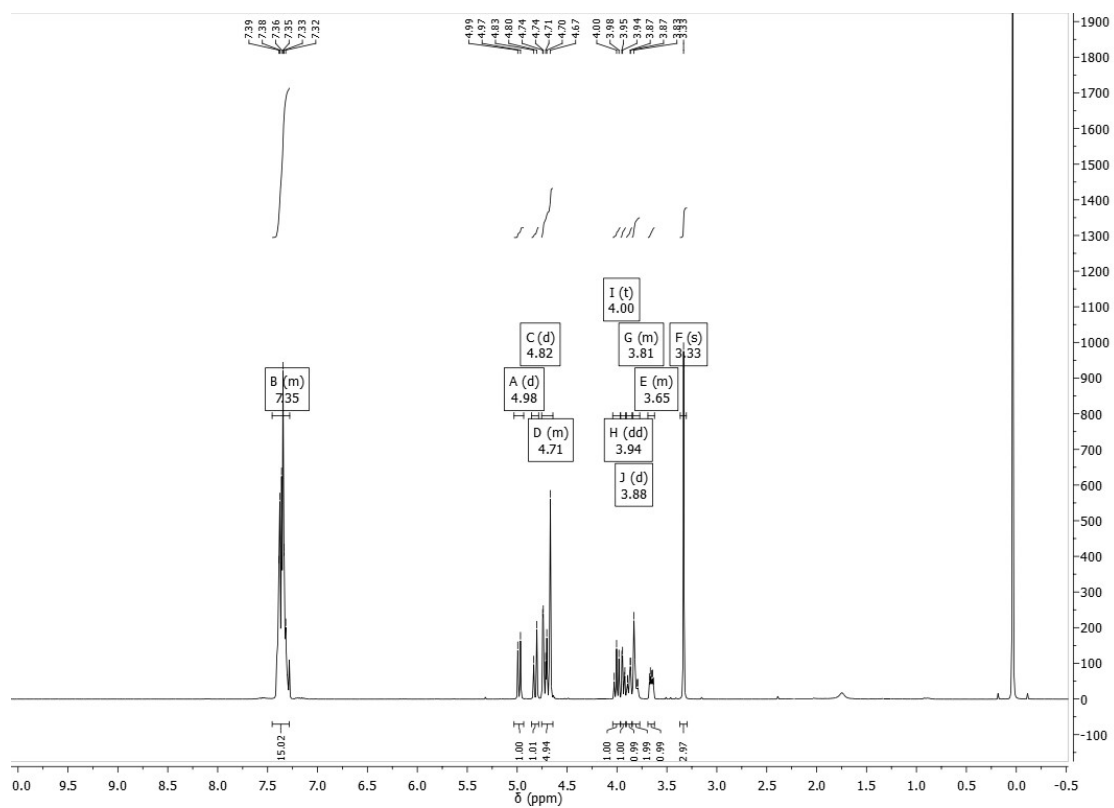

Figure S5.  $^1\text{H}$ -NMR spectra of compound **12**

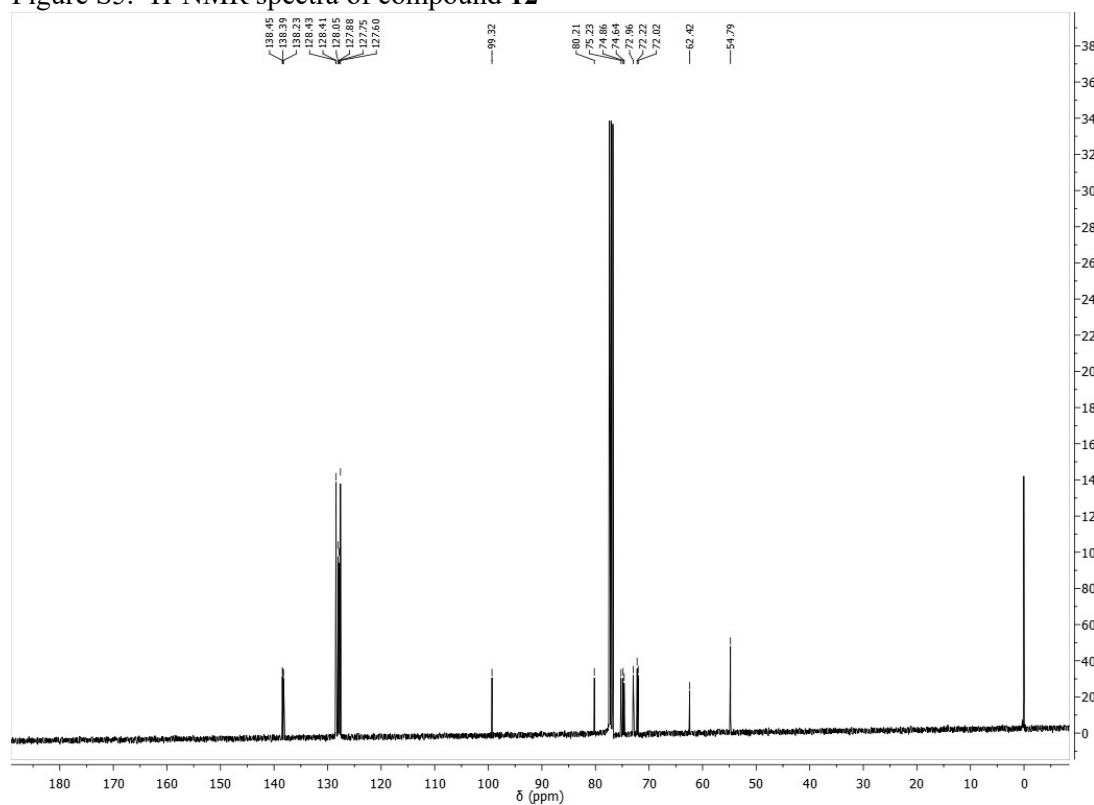

Figure S6.  $^{13}\text{C}$ -NMR spectra of compound **12**

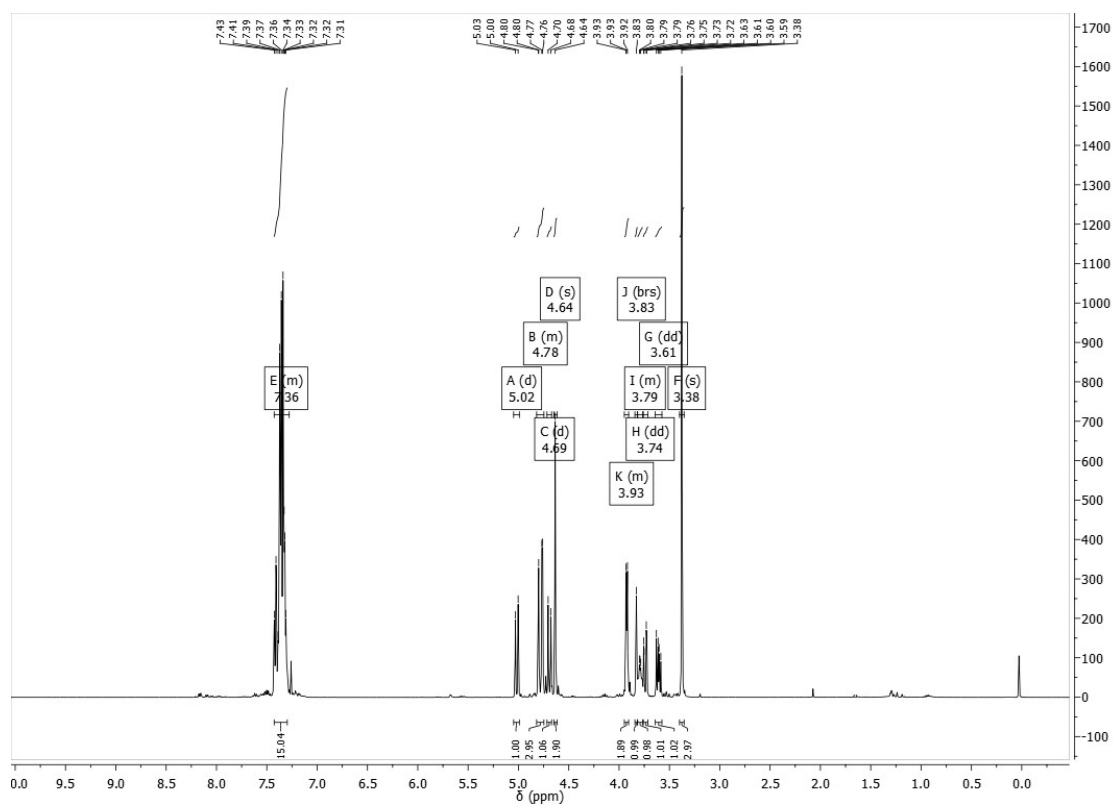

Figure S7.  $^1\text{H}$ -NMR spectra of compound **13**

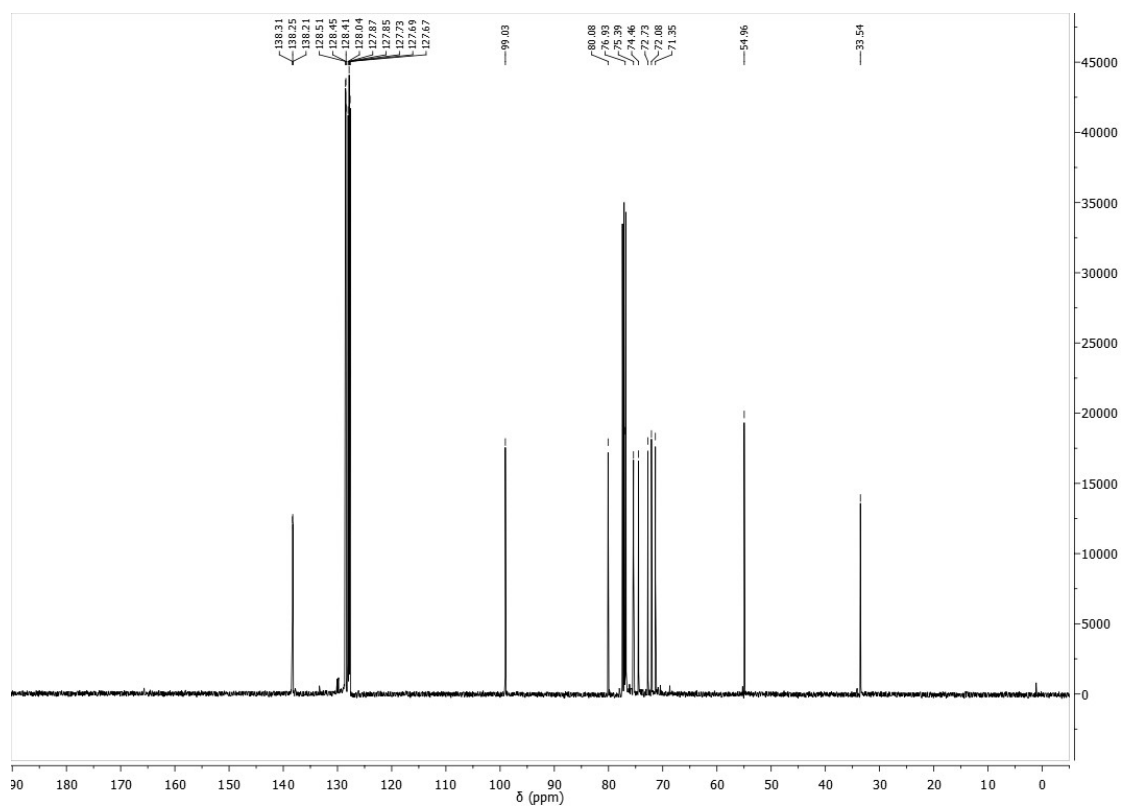

Figure S8.  $^{13}\text{C}$ -NMR spectra of compound **13**

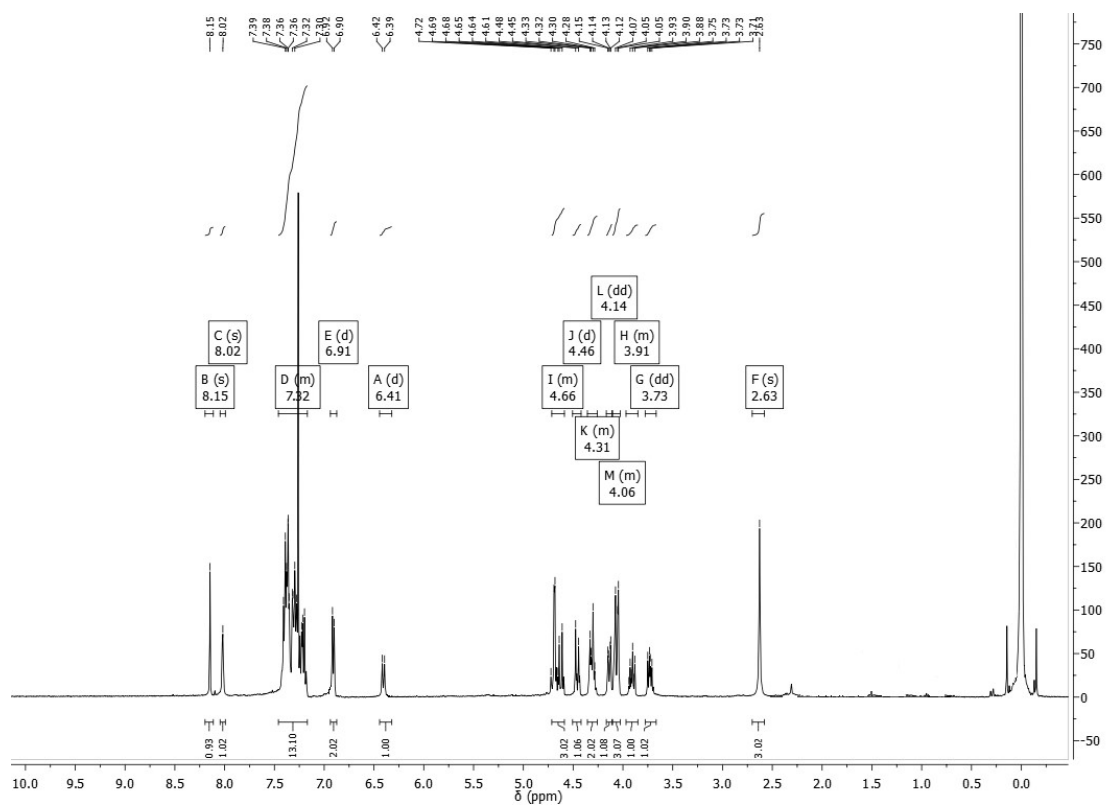

Figure S9.  $^1\text{H}$ -NMR spectra of compound **14**

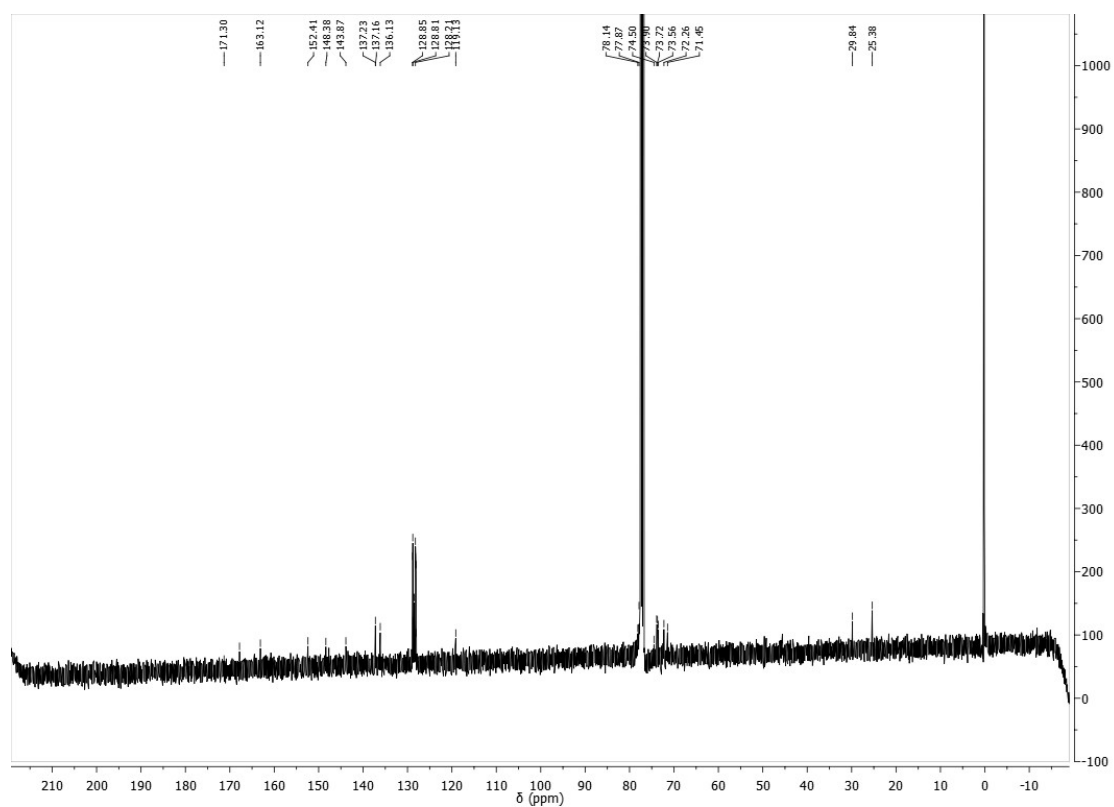

Figure S10.  $^{13}\text{C}$ -NMR spectra of compound **14**

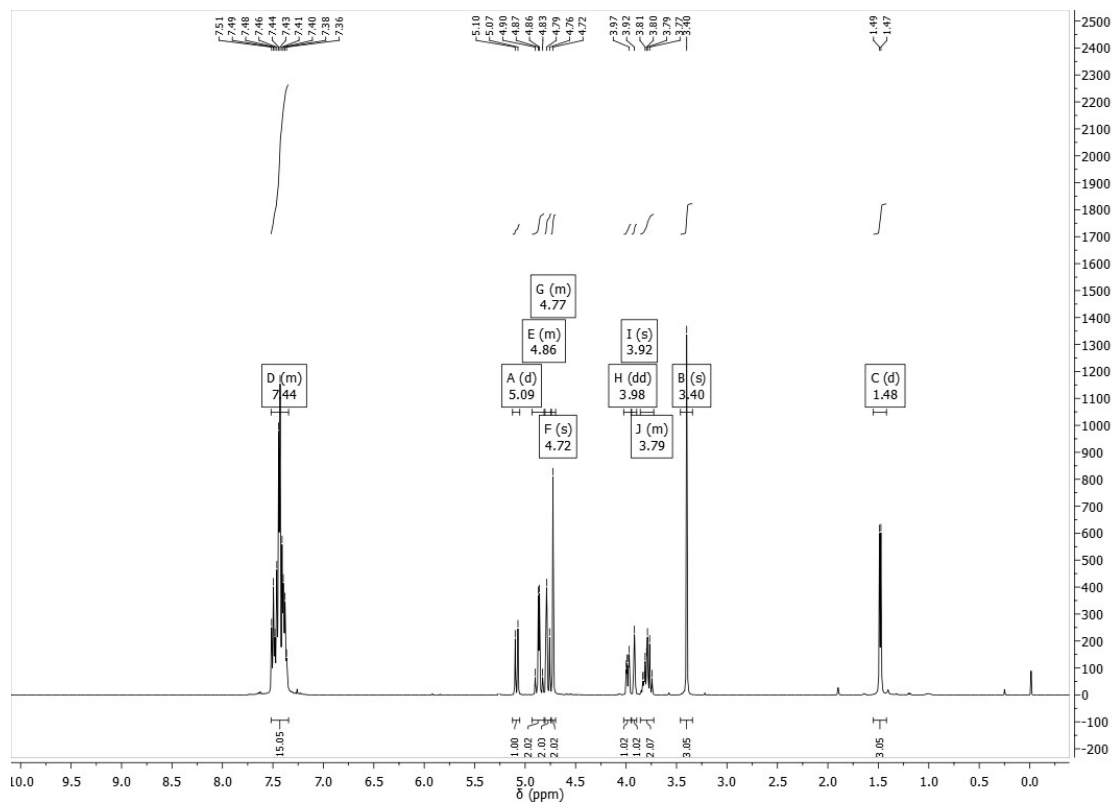

Figure S11. <sup>1</sup>H-NMR spectra of compound **16**

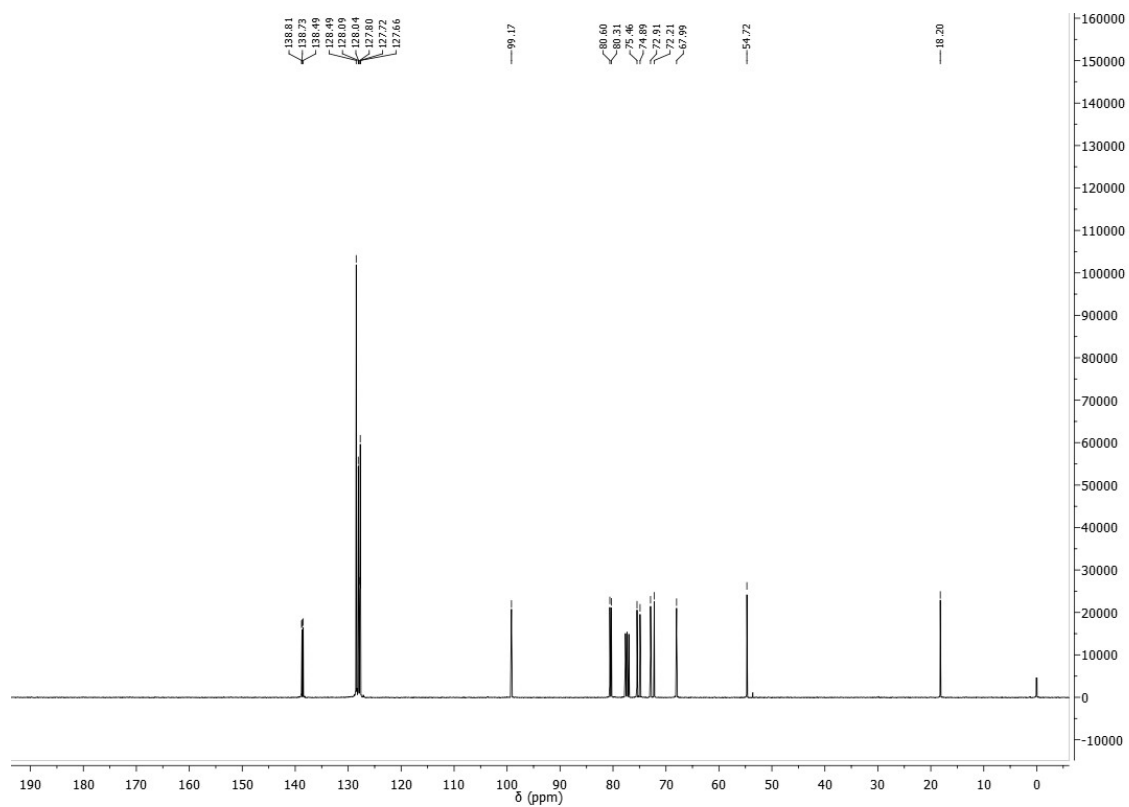

Figure S12. <sup>13</sup>C-NMR spectra of compound **16**

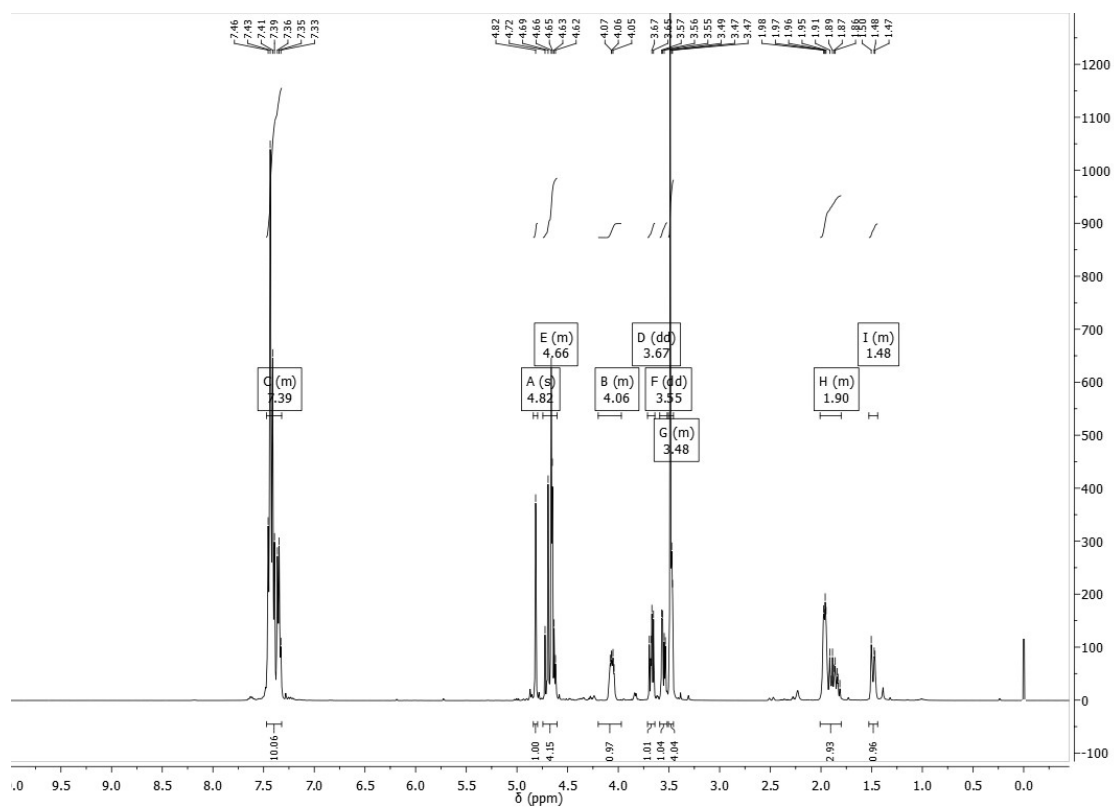

Figure S13.  $^1\text{H-NMR}$  spectra of compound **17**

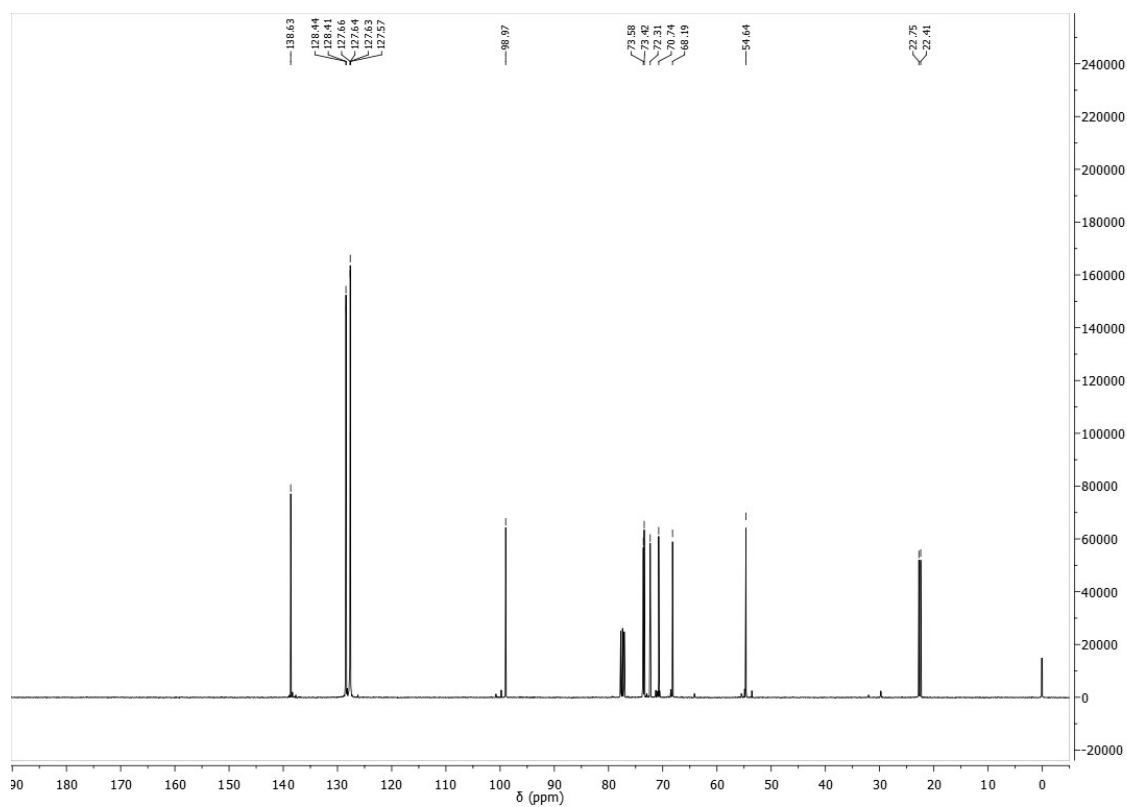

Figure S14.  $^{13}\text{C-NMR}$  spectra of compound **17**

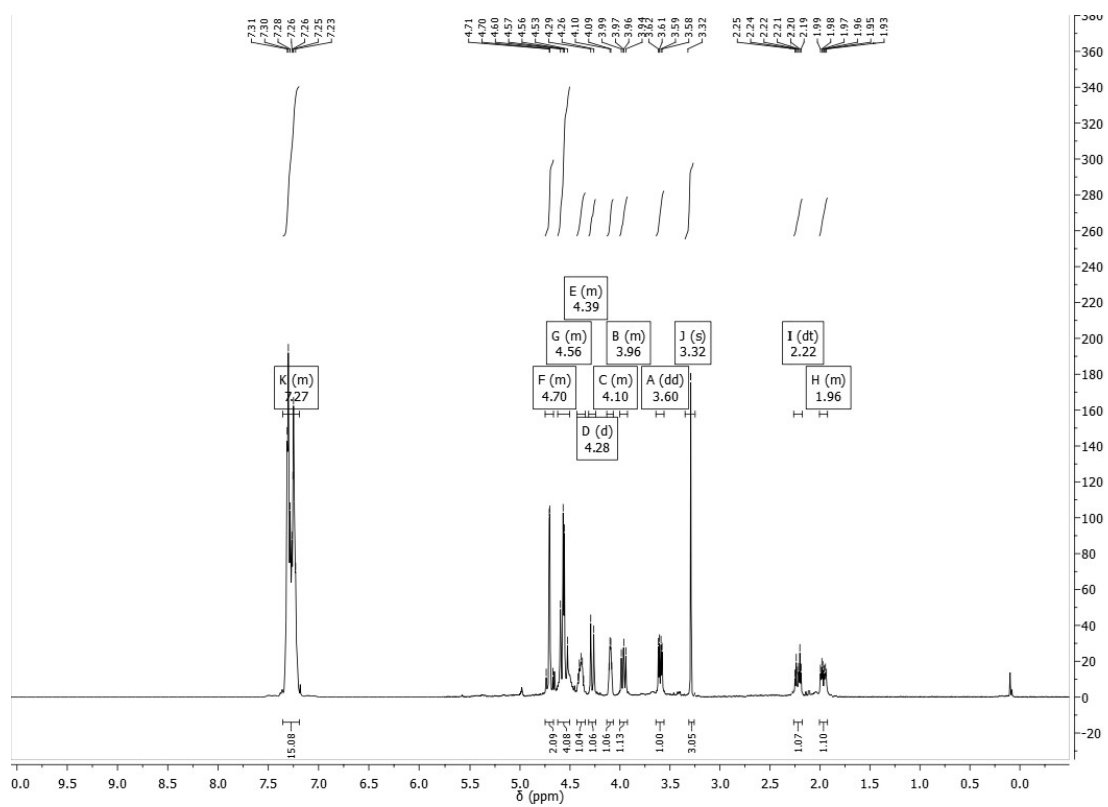

Figure S15.  $^1\text{H}$ -NMR spectra of compound **18**

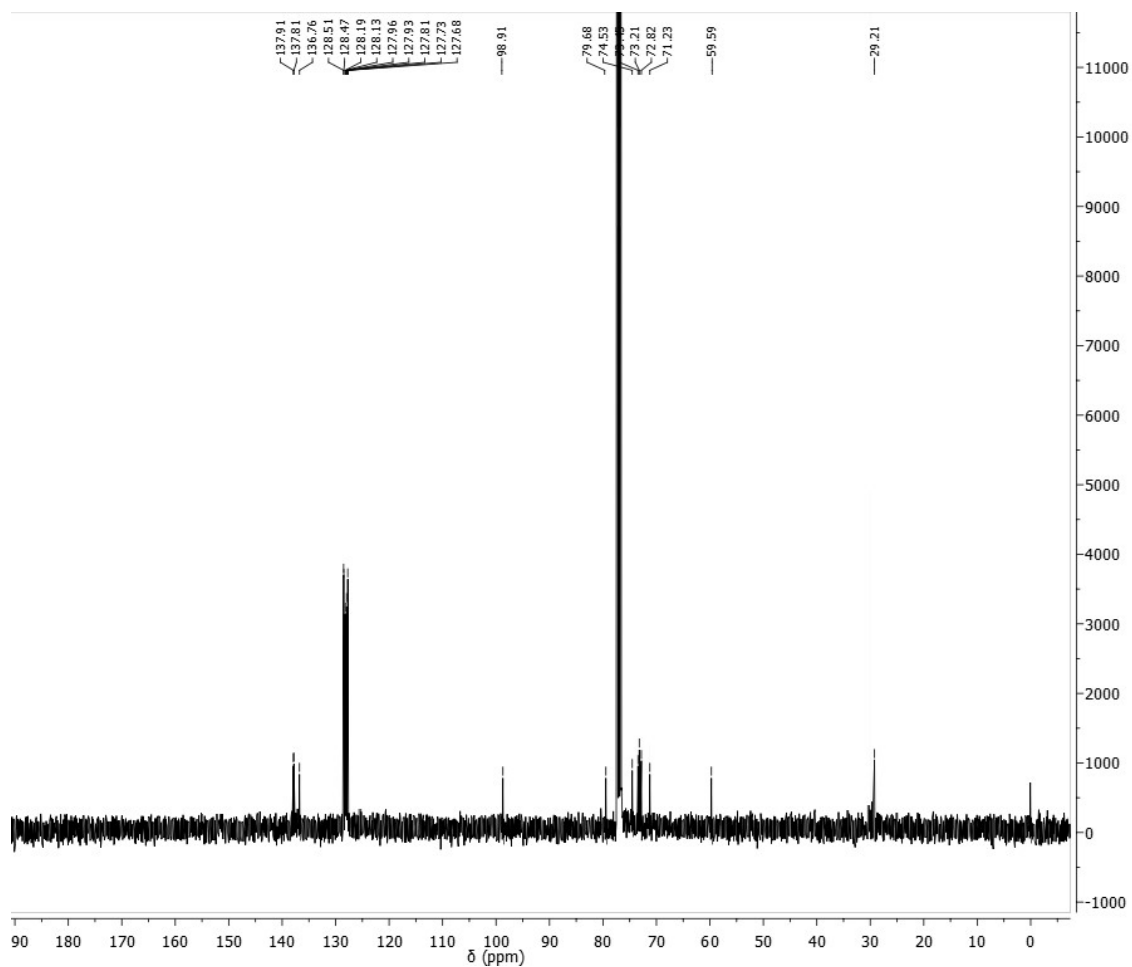

Figure S16.  $^{13}\text{C}$ -NMR spectra of compound **18**



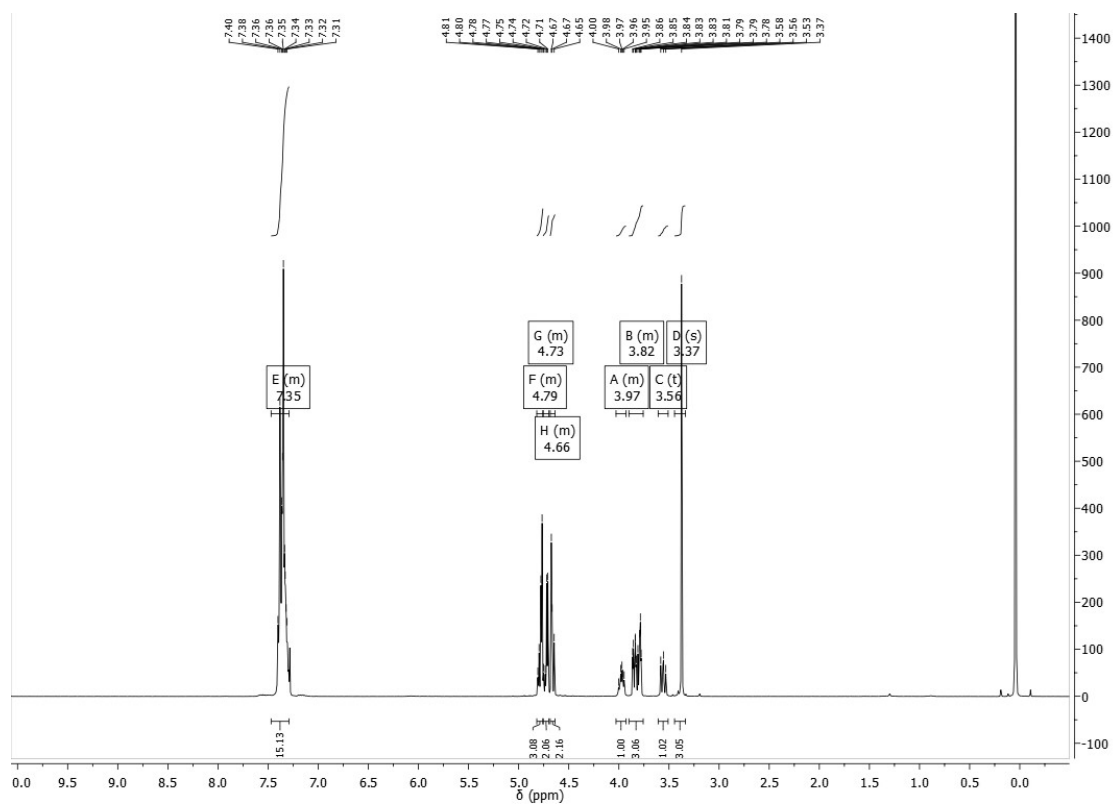

Figure S17. <sup>1</sup>H-NMR spectra of compound **19**

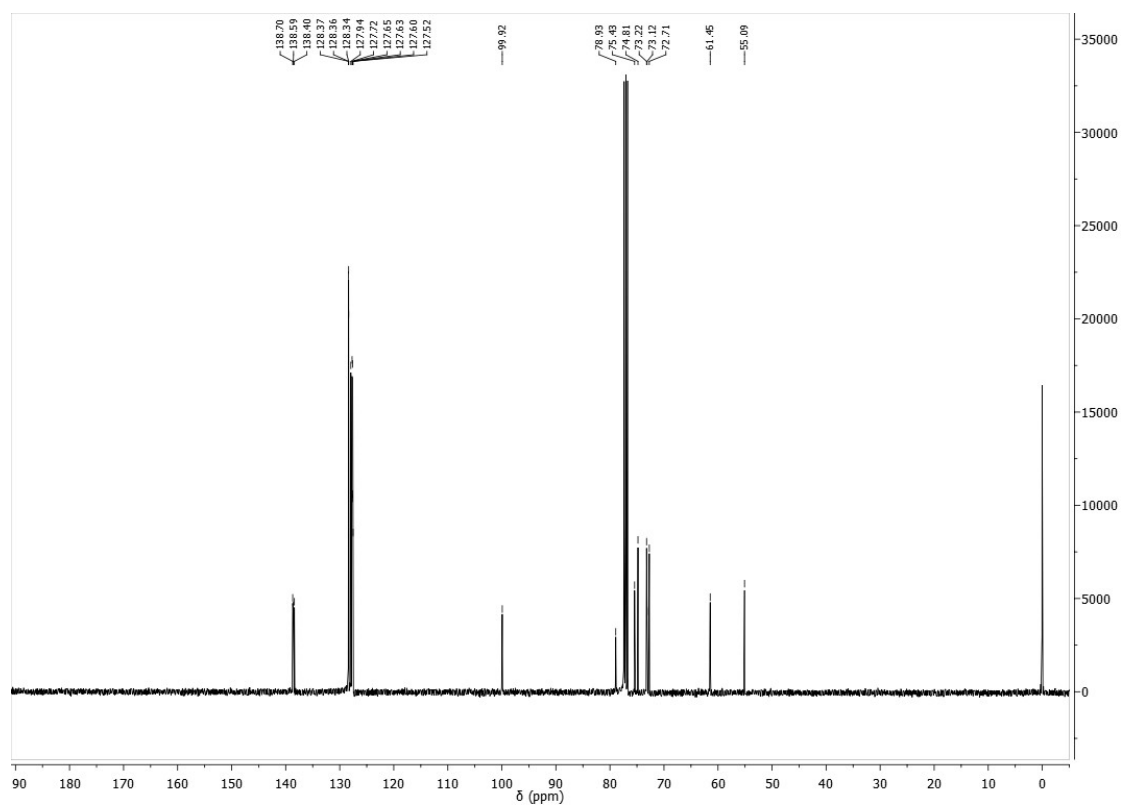

Figure S18. <sup>13</sup>C-NMR spectra of compound **19**

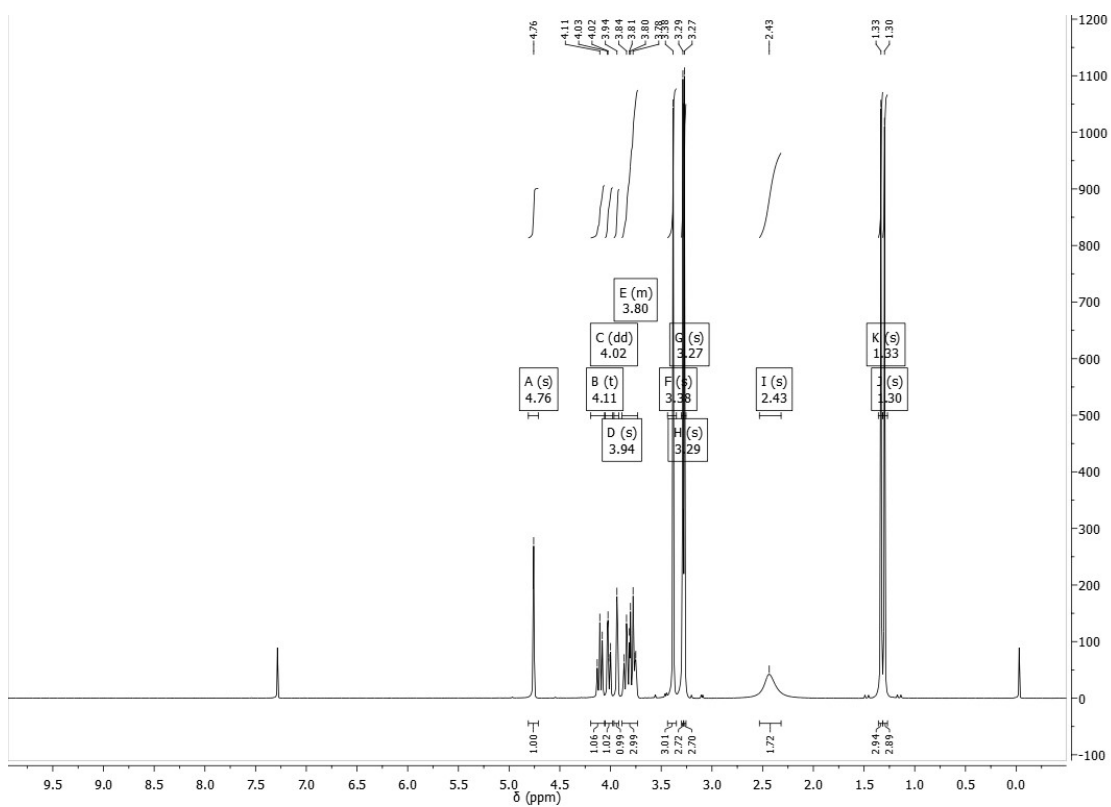

Figure S19. <sup>1</sup>H-NMR spectra of compound **20**

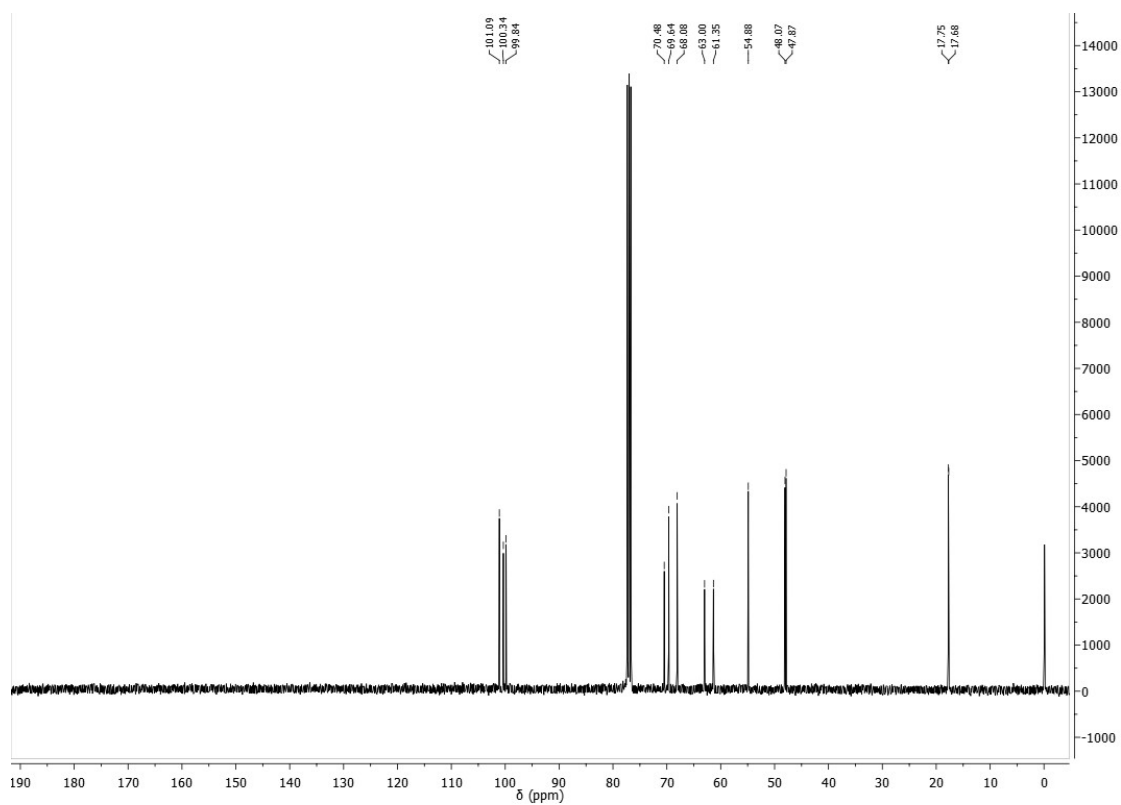

Figure S20. <sup>13</sup>C-NMR spectra of compound **20**

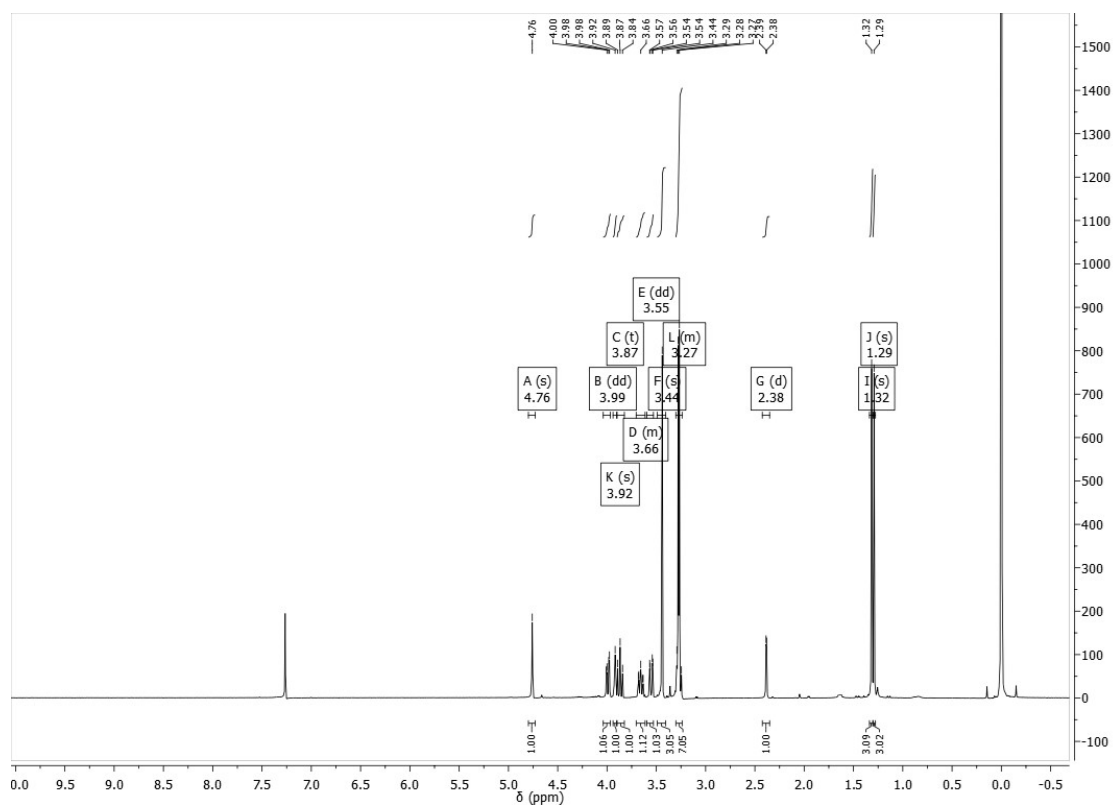

Figure S21. <sup>1</sup>H-NMR spectra of compound **21**

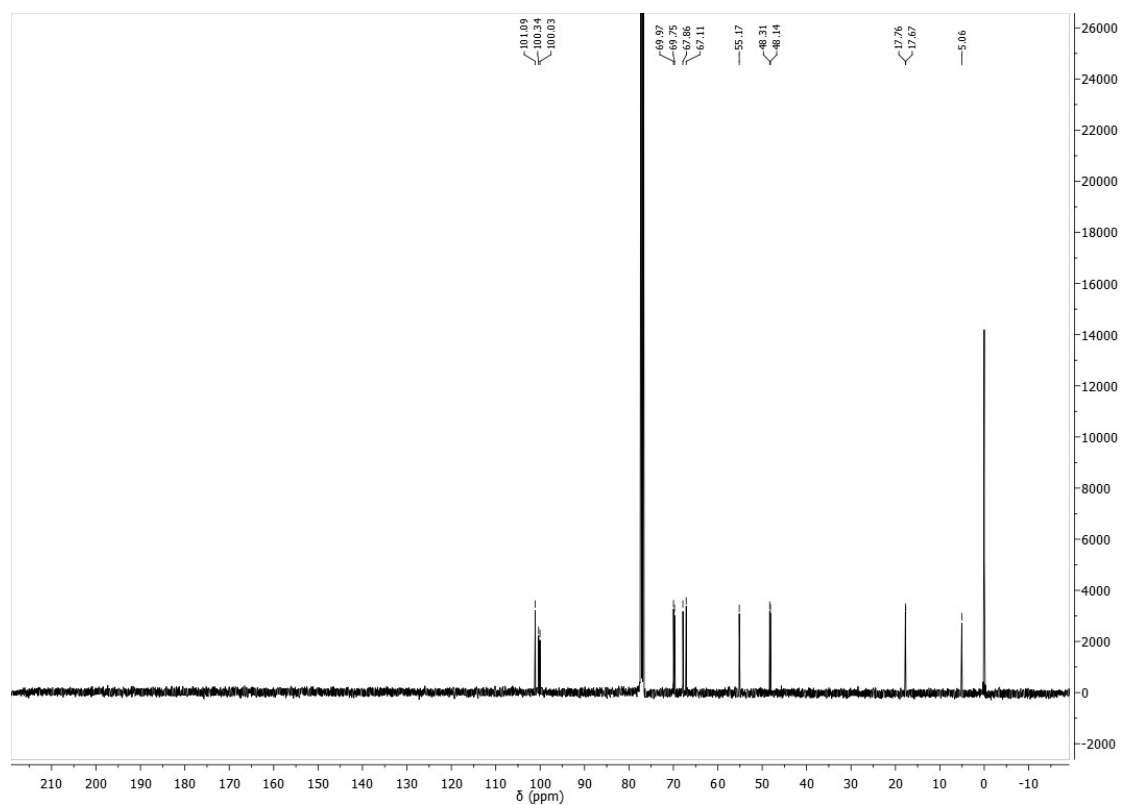

Figure S22. <sup>13</sup>C-NMR spectra of compound **21**

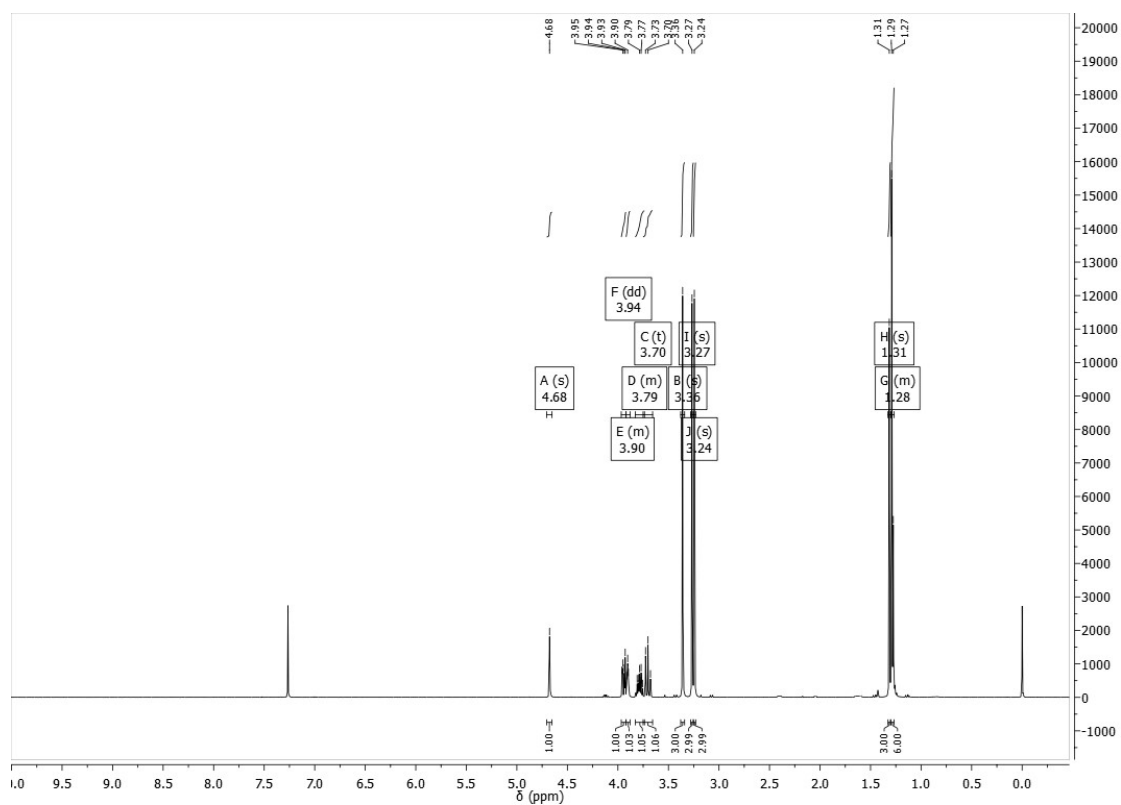

Figure S23. <sup>1</sup>H-NMR spectra of compound **22**

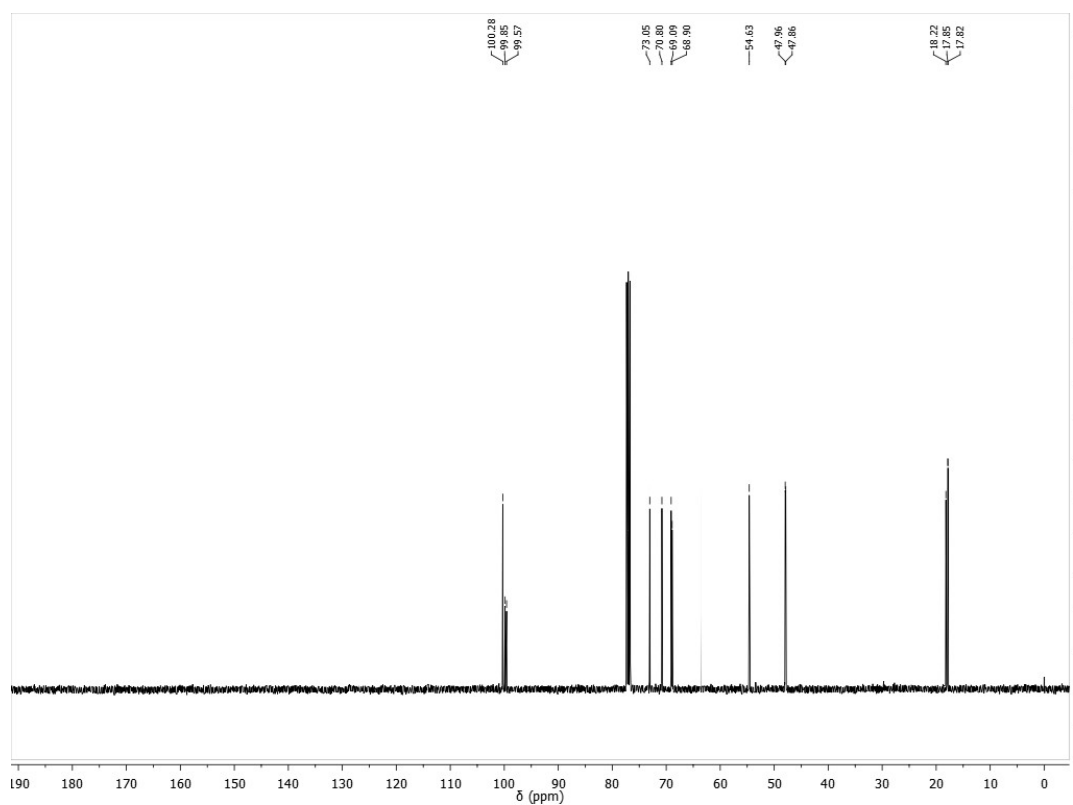

Figure S24. <sup>13</sup>C-NMR spectra of compound **22**

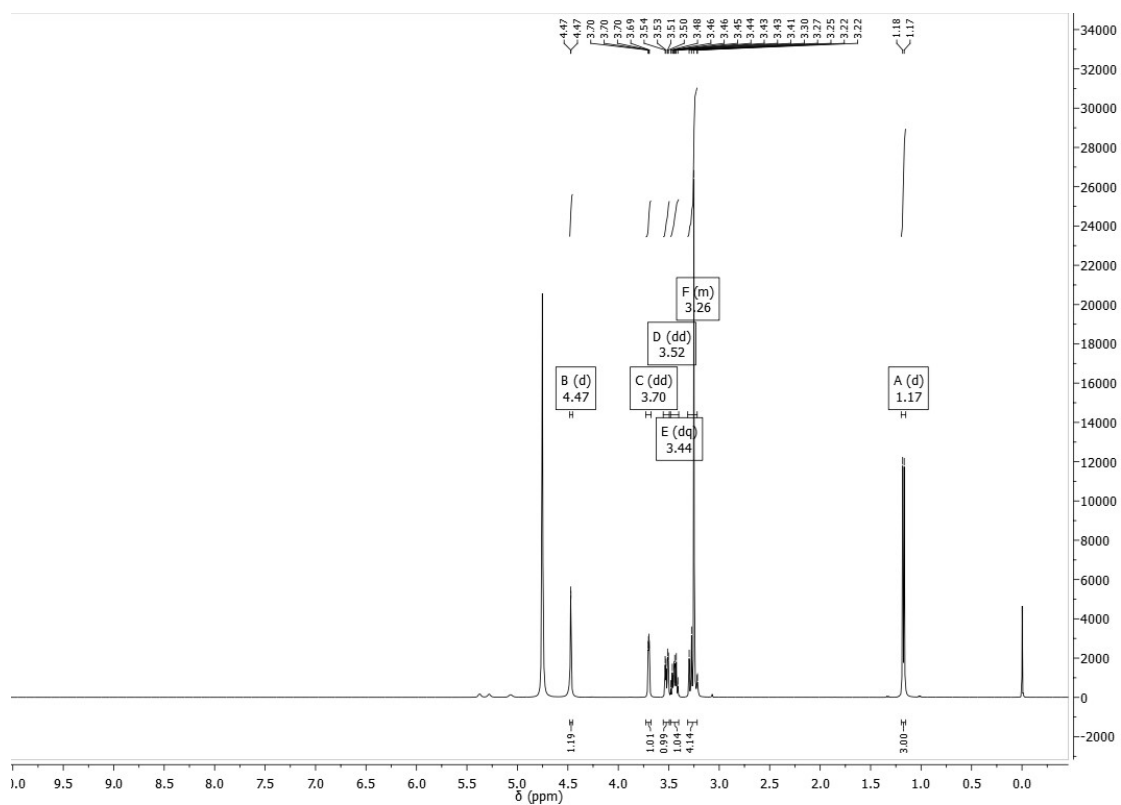

Figure S25.  $^1\text{H-NMR}$  spectra of compound **23**

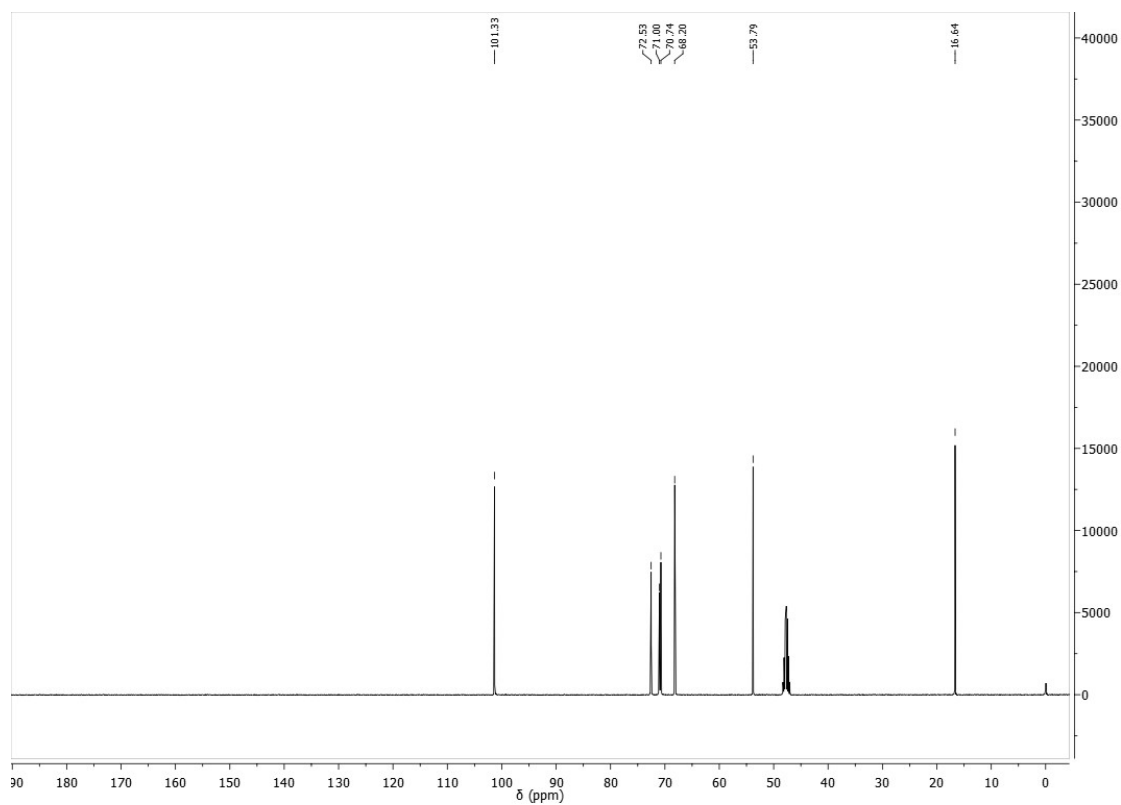

Figure S26.  $^{13}\text{C-NMR}$  spectra of compound **23**

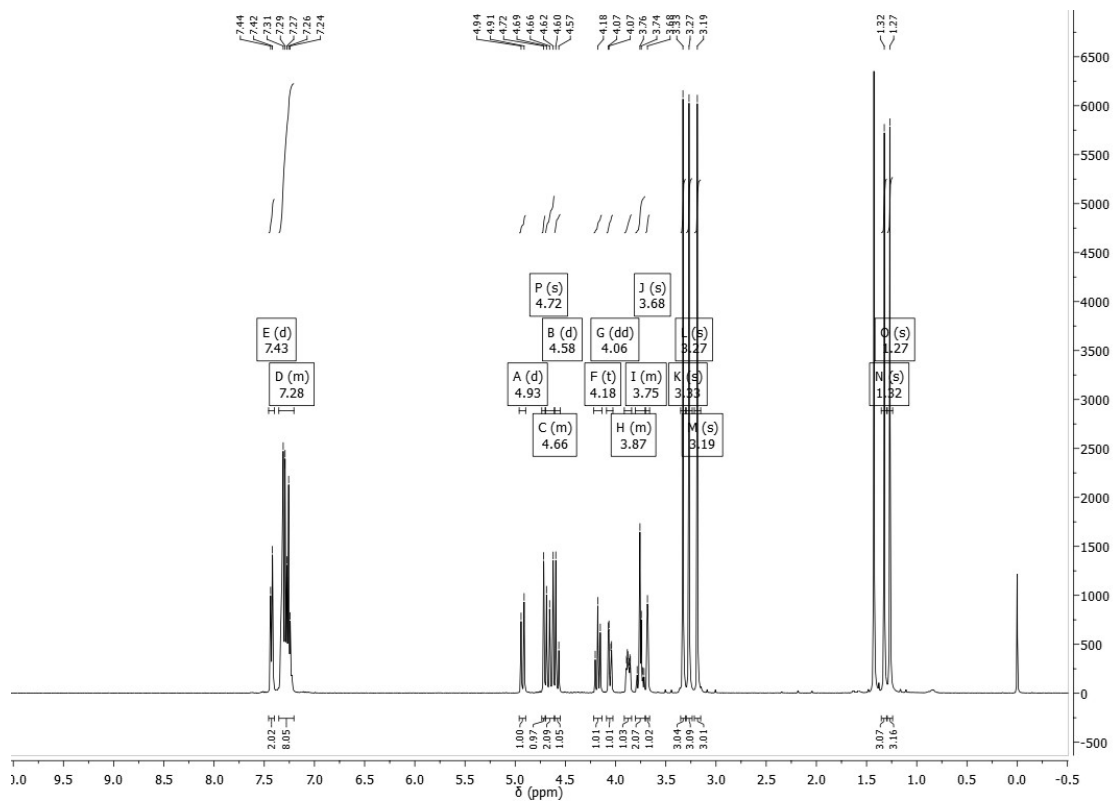

Figure S27. <sup>1</sup>H-NMR spectra of compound **24**

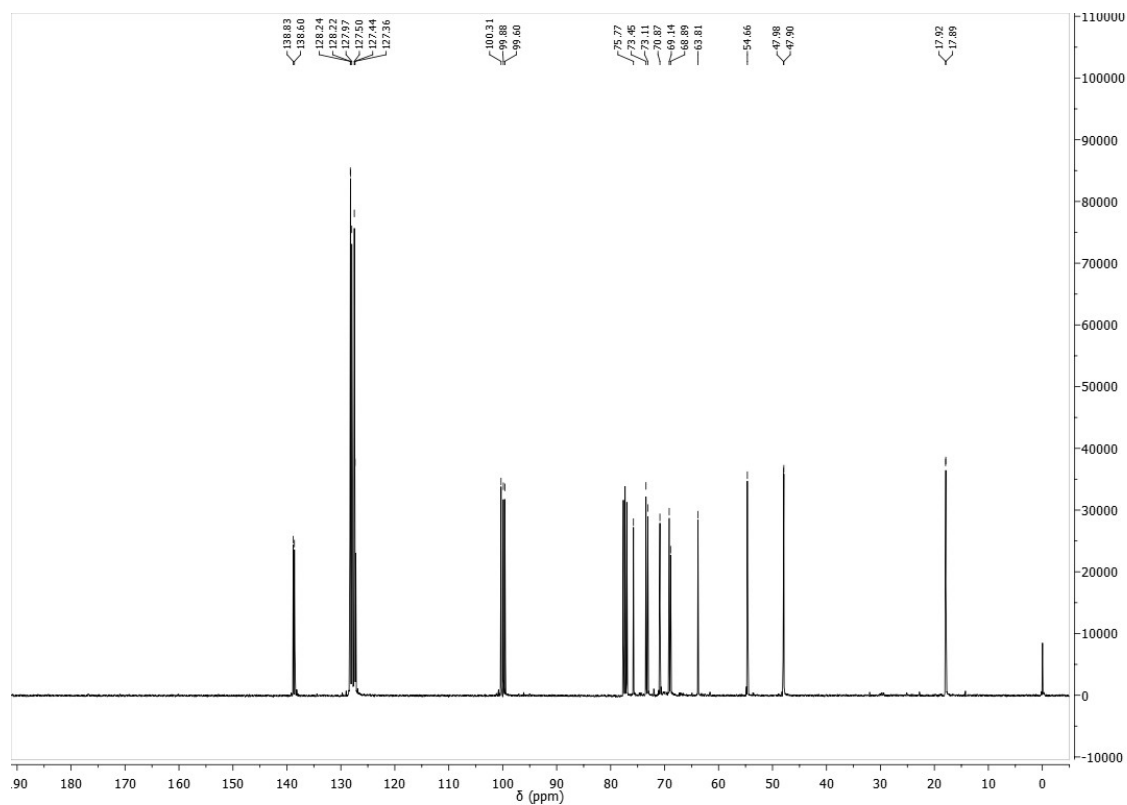

Figure S28. <sup>13</sup>C-NMR spectra of compound **24**

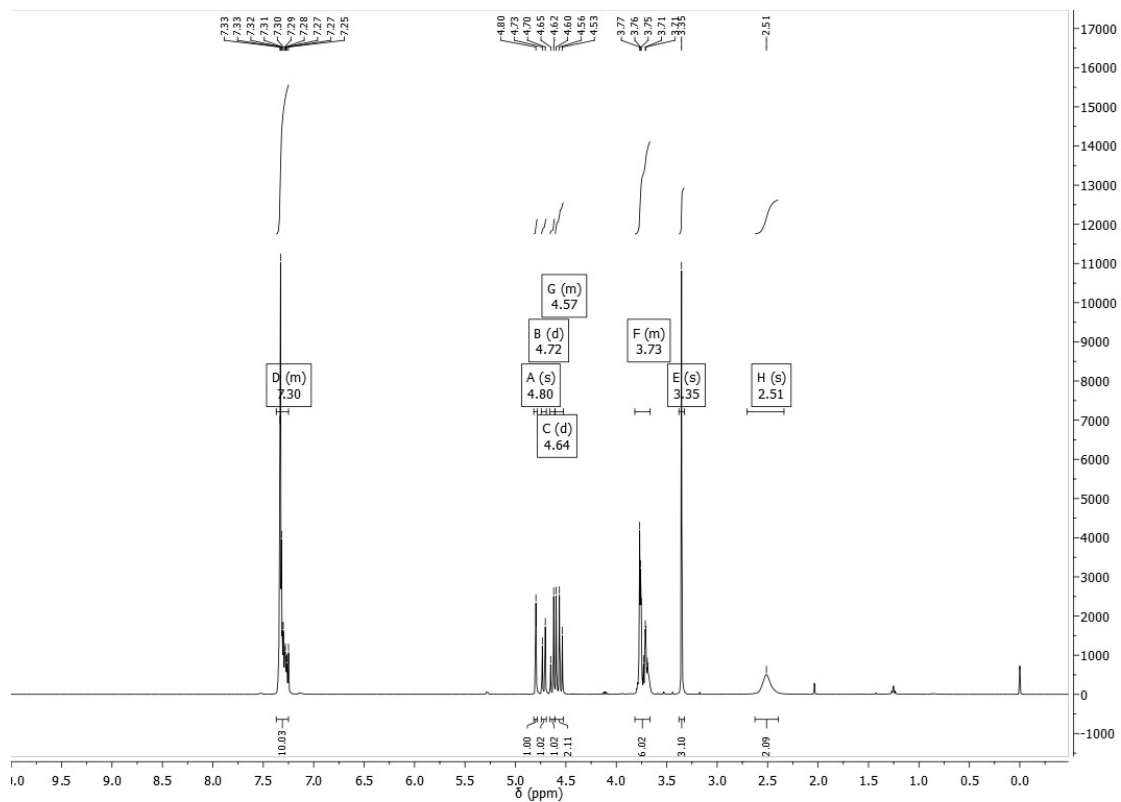

Figure S29. <sup>1</sup>H-NMR spectra of compound **25**

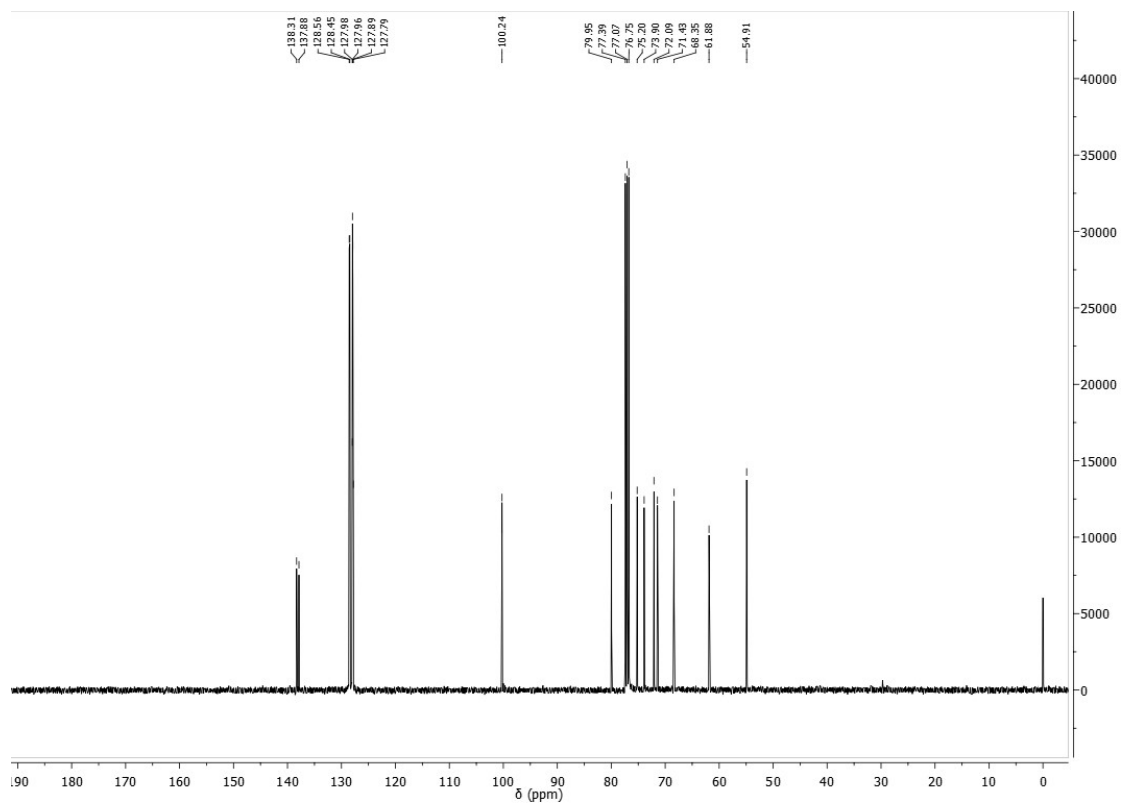

Figure S30. <sup>13</sup>C-NMR spectra of compound **25**

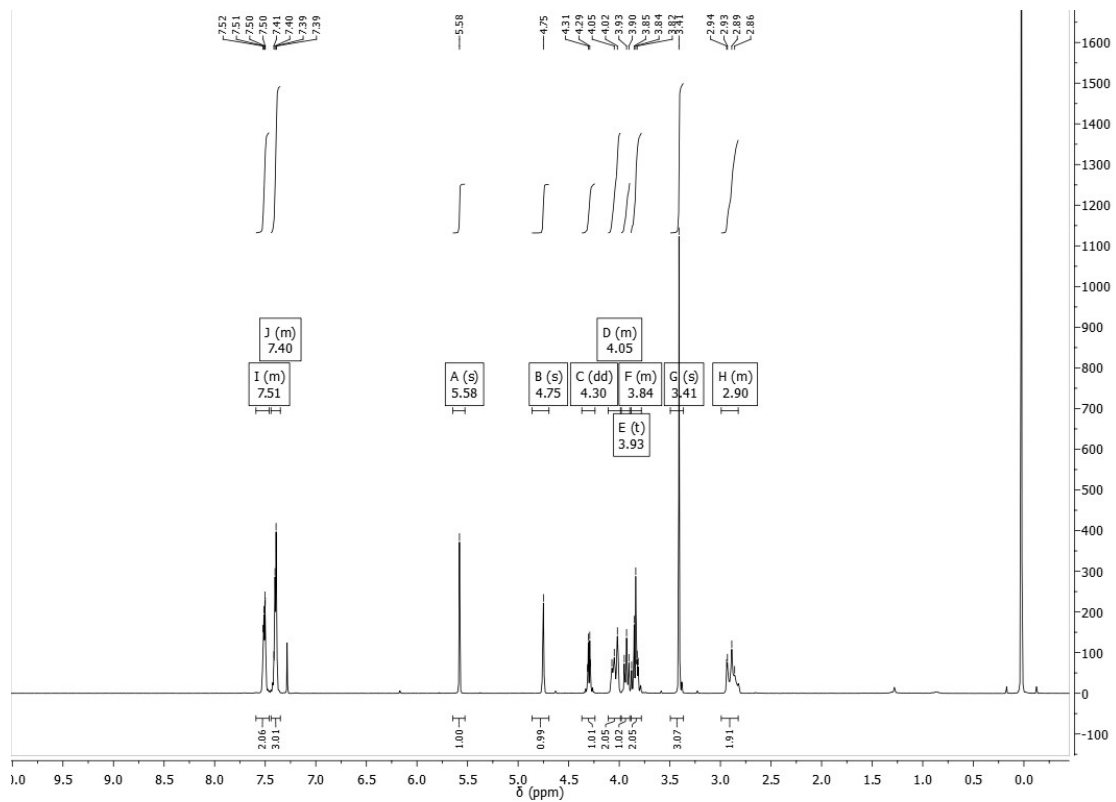

Figure S31.  $^1\text{H}$ -NMR spectra of compound **26**

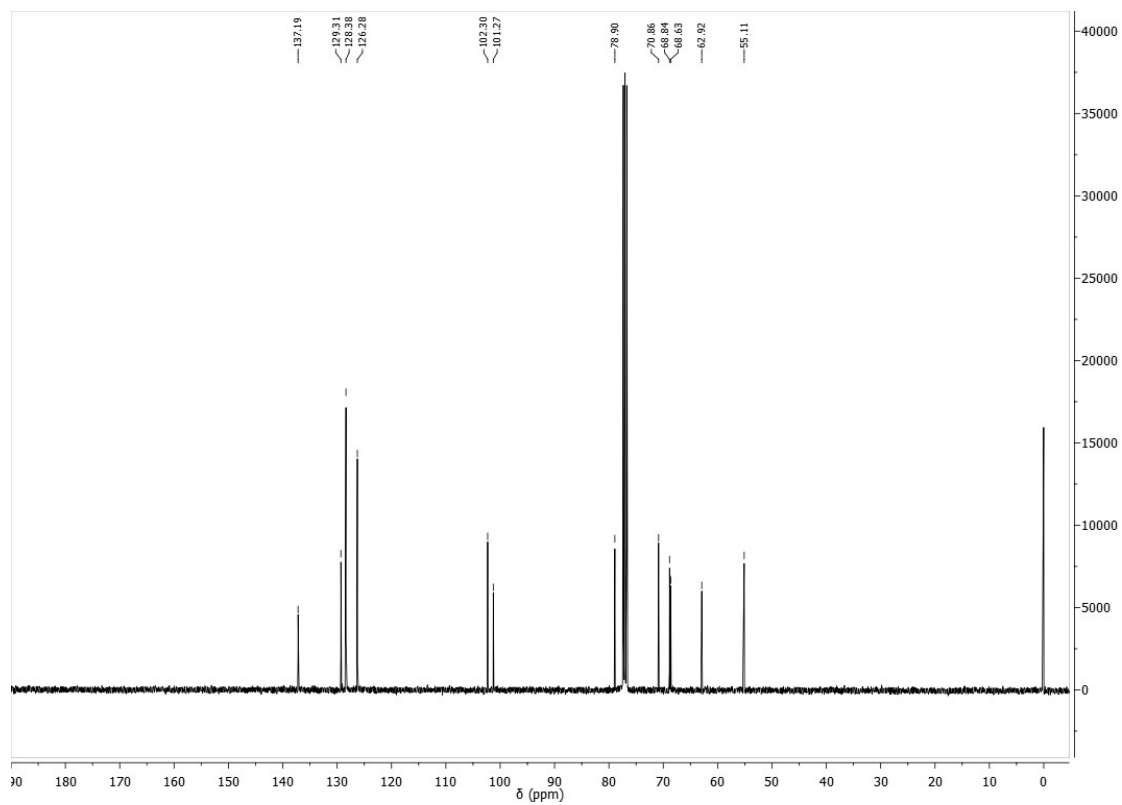

Figure S32.  $^{13}\text{C}$ -NMR spectra of compound **26**



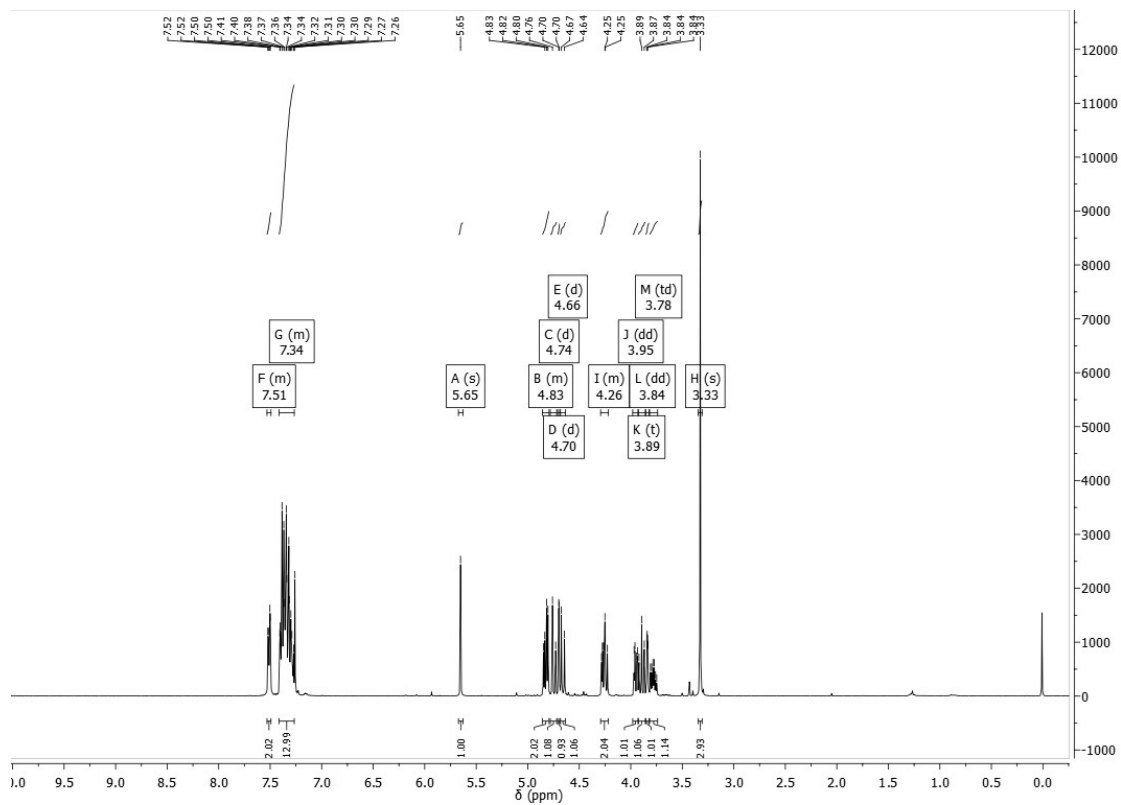

Figure S33. <sup>1</sup>H-NMR spectra of compound **27**

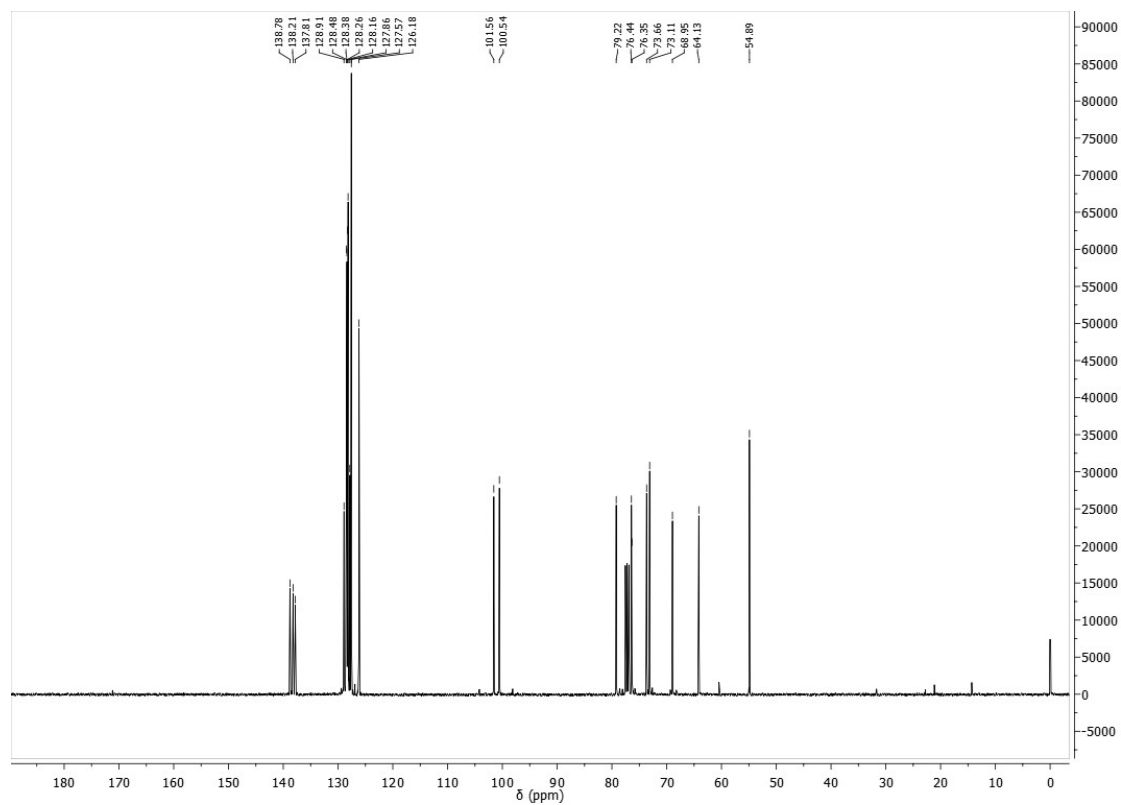

Figure S34. <sup>13</sup>C-NMR spectra of compound **27**

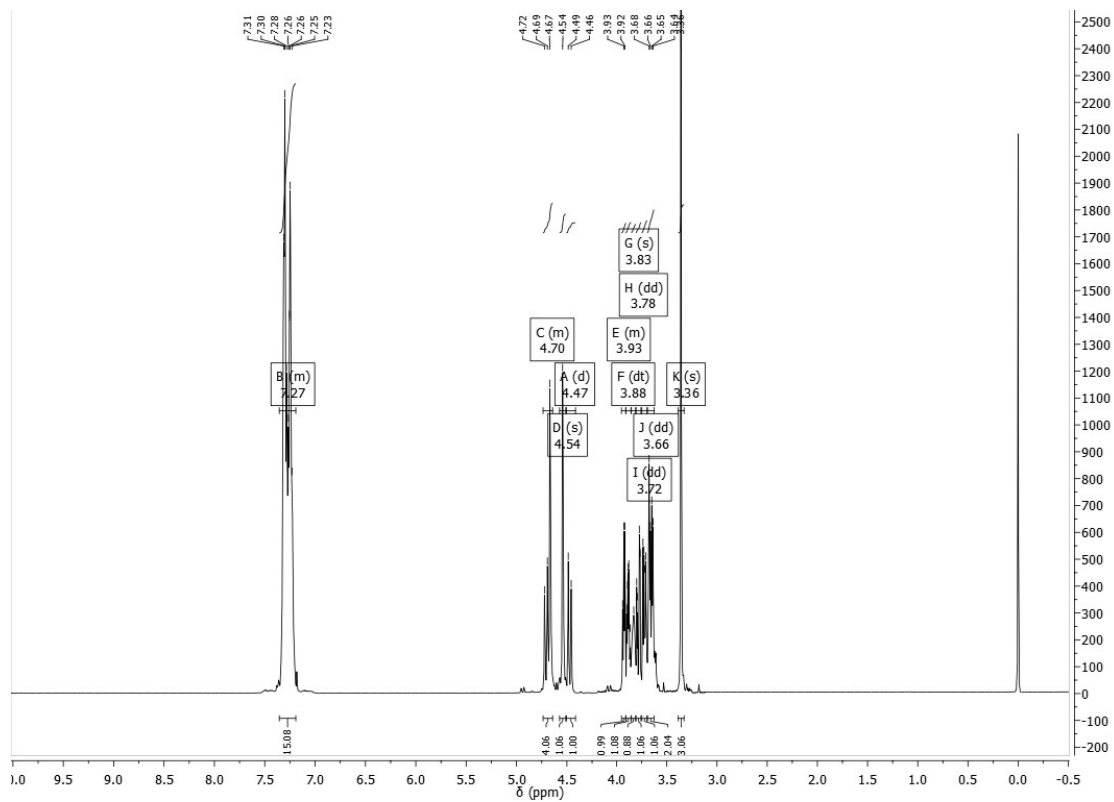

Figure S35. <sup>1</sup>H-NMR spectra of compound **28**

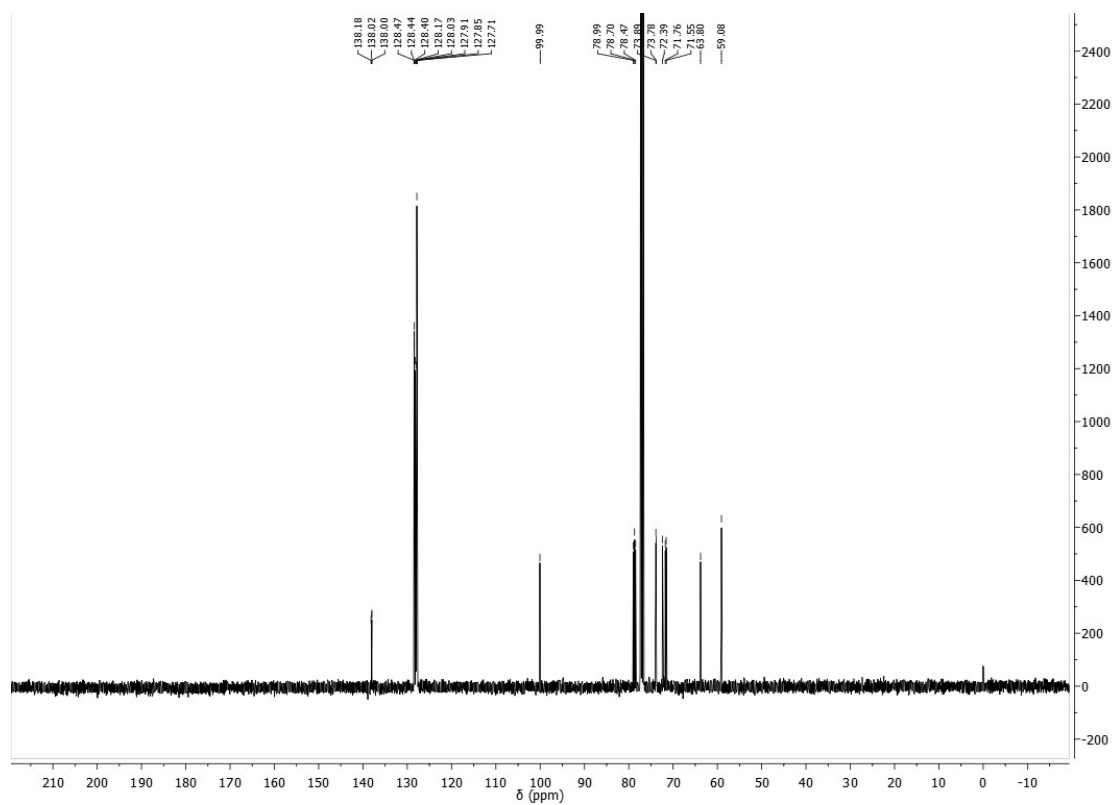

Figure S36. <sup>13</sup>C-NMR spectra of compound **28**

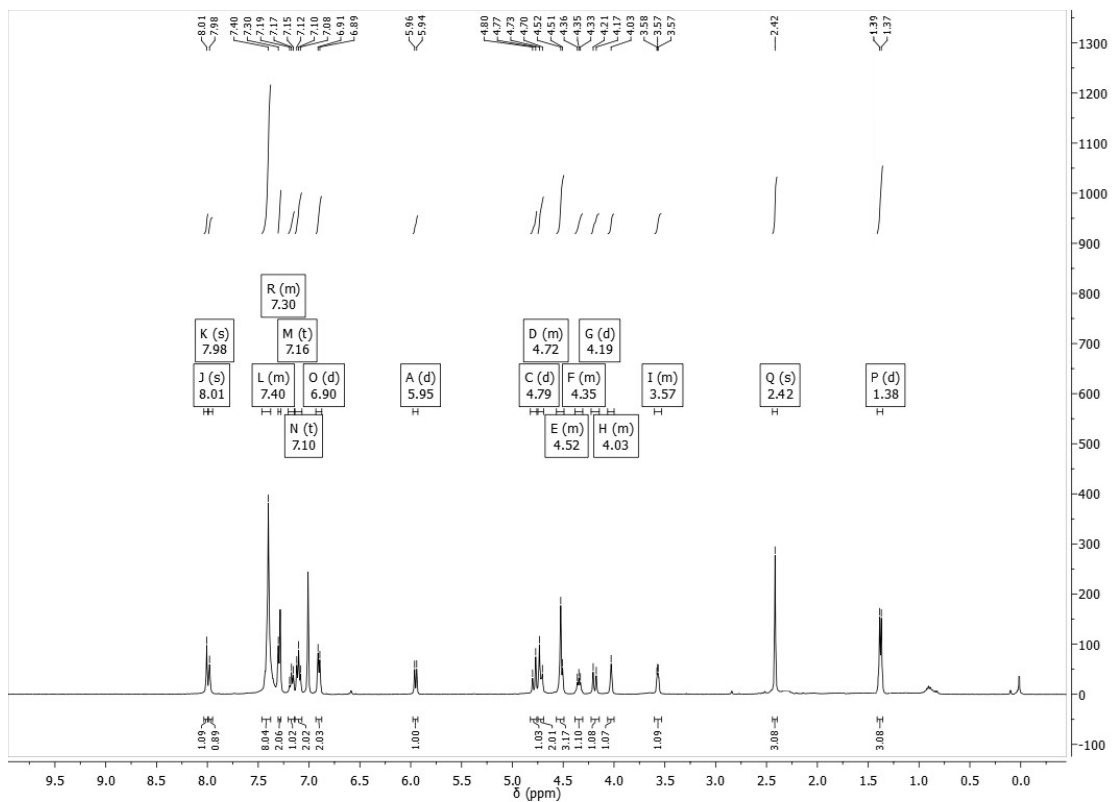

Figure S37. <sup>1</sup>H-NMR spectra of compound **30**

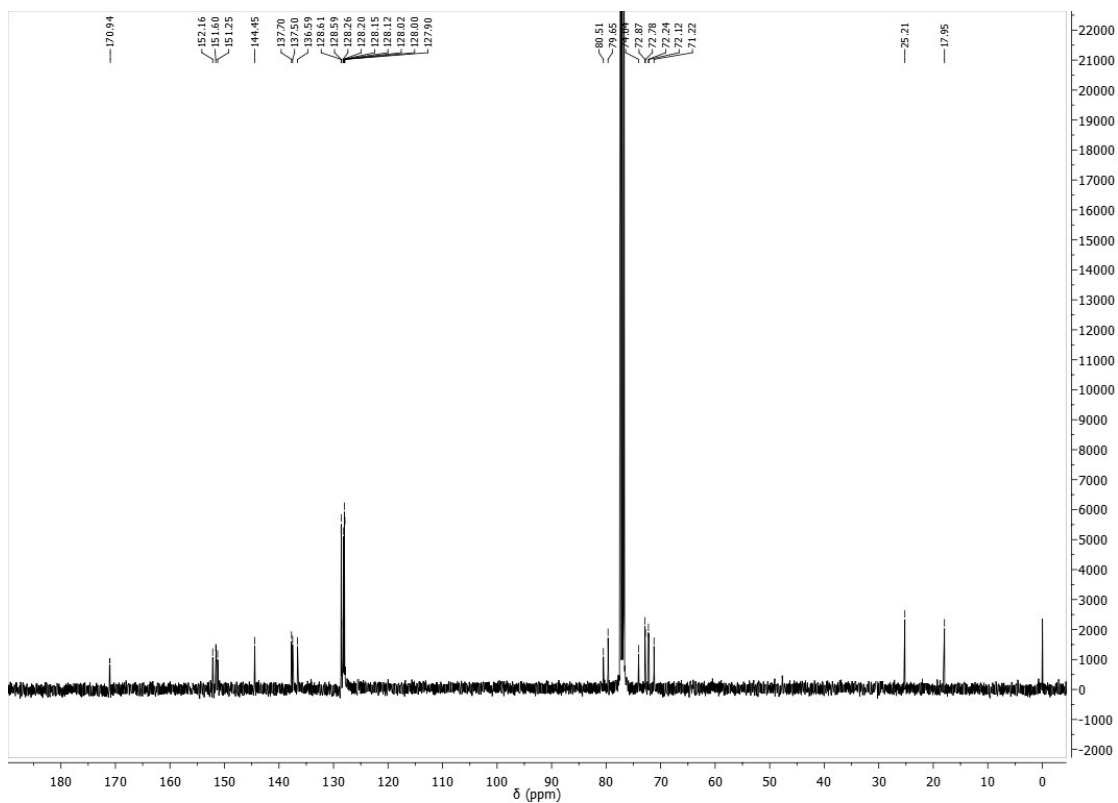

Figure S38. <sup>13</sup>C-NMR spectra of compound **30**

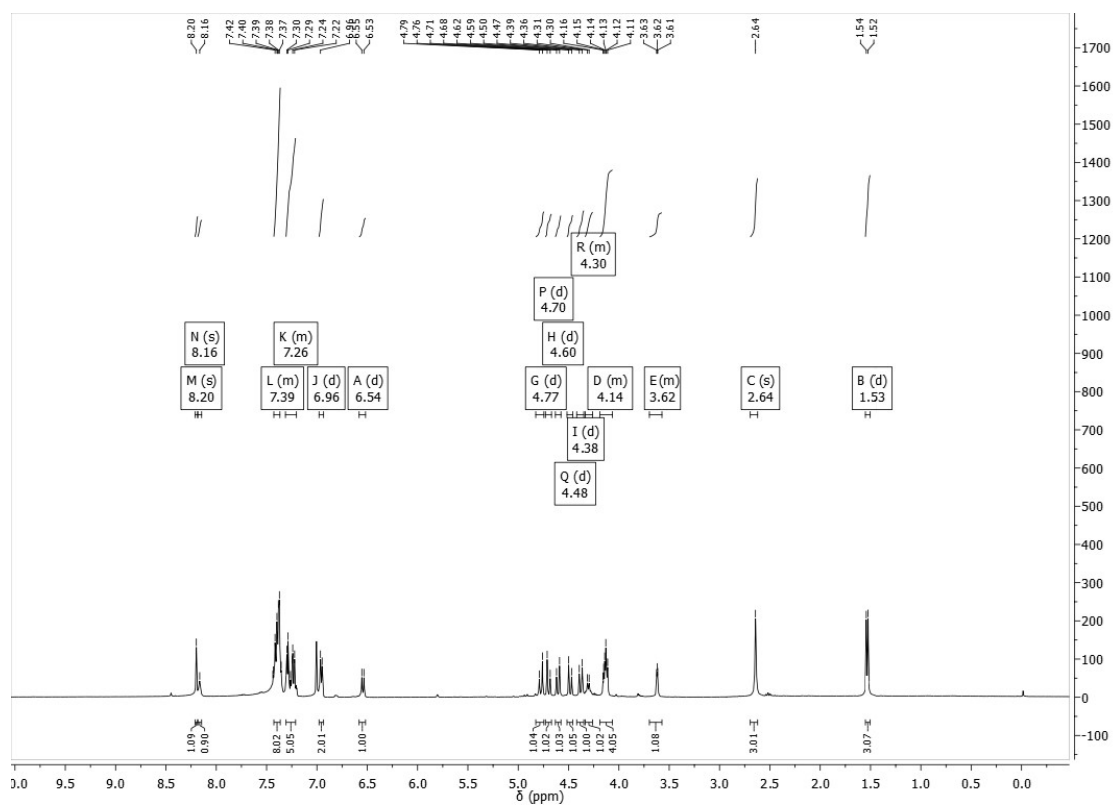

Figure S39. <sup>1</sup>H-NMR spectra of compound **31**

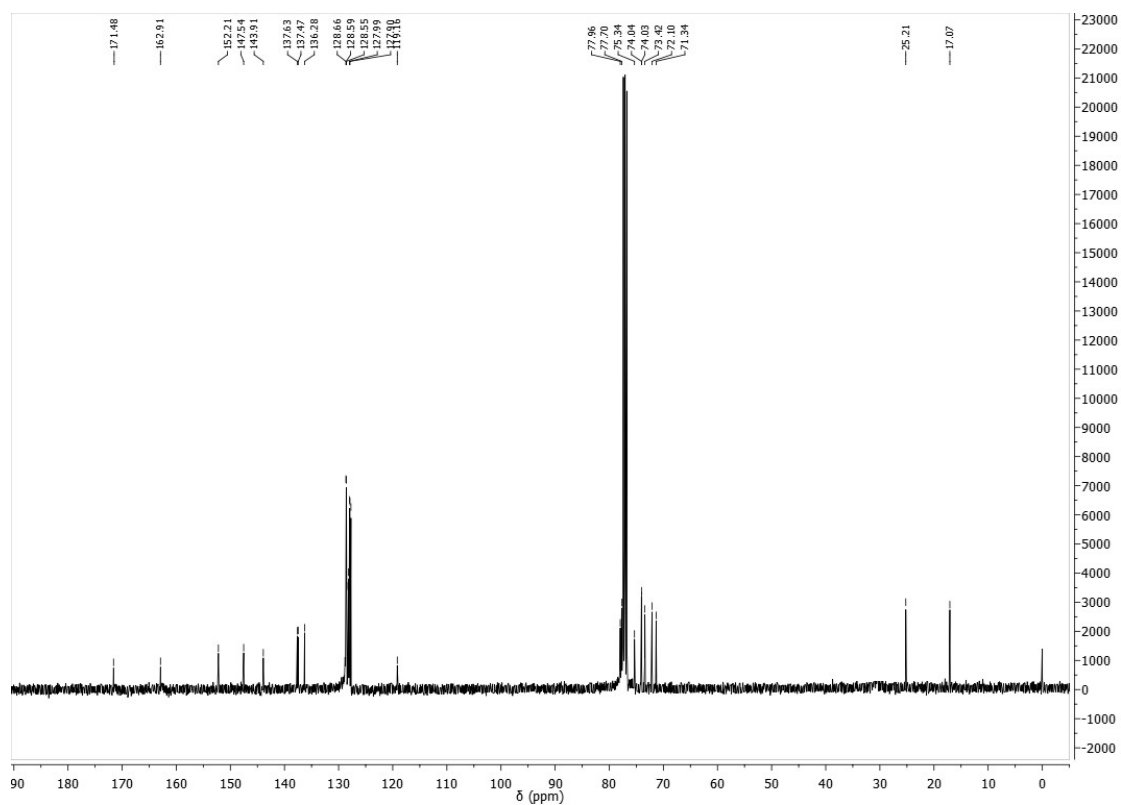

Figure S40. <sup>13</sup>C-NMR spectra of compound **31**

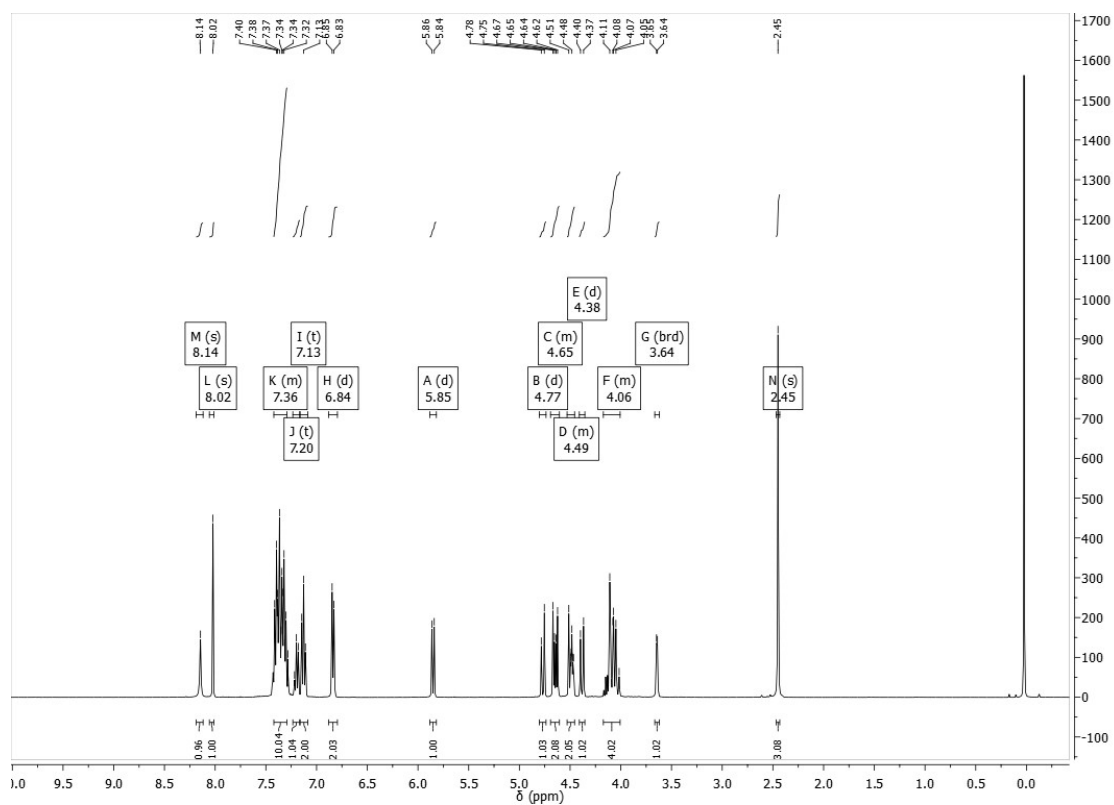

Figure S41. <sup>1</sup>H-NMR spectra of compound **32**

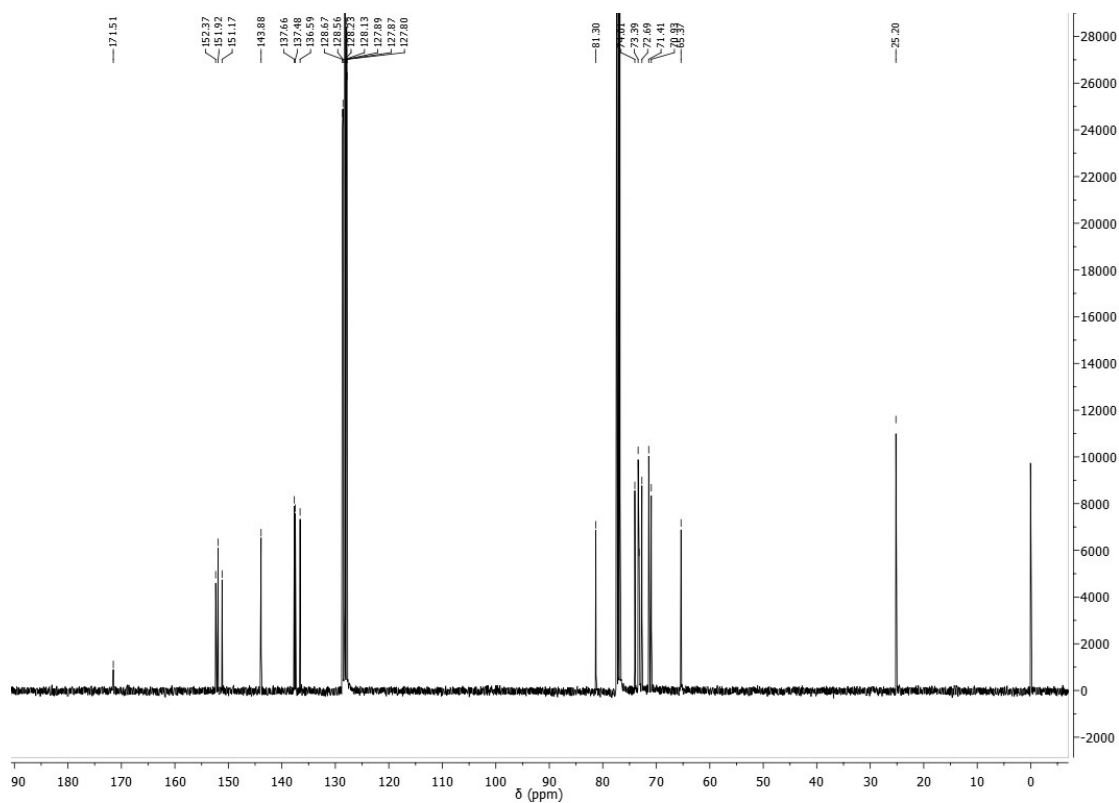

Figure S42. <sup>13</sup>C-NMR spectra of compound **32**

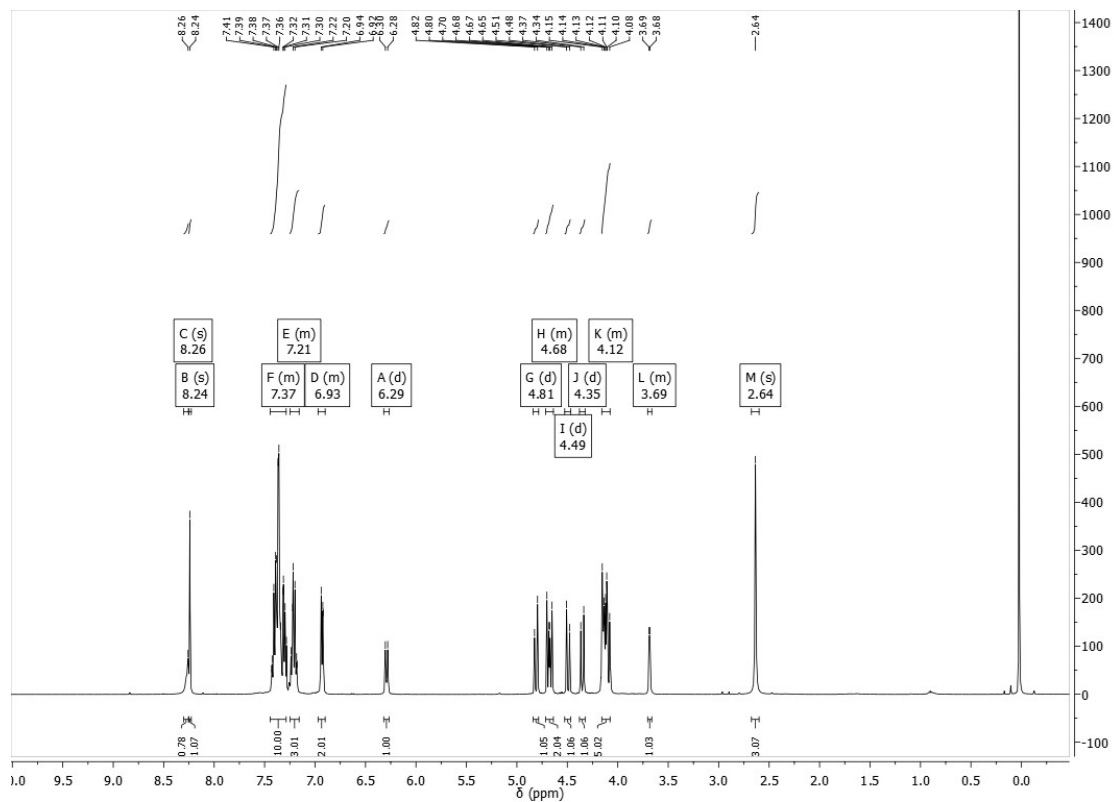

Figure S43. <sup>1</sup>H-NMR spectra of compound **33**

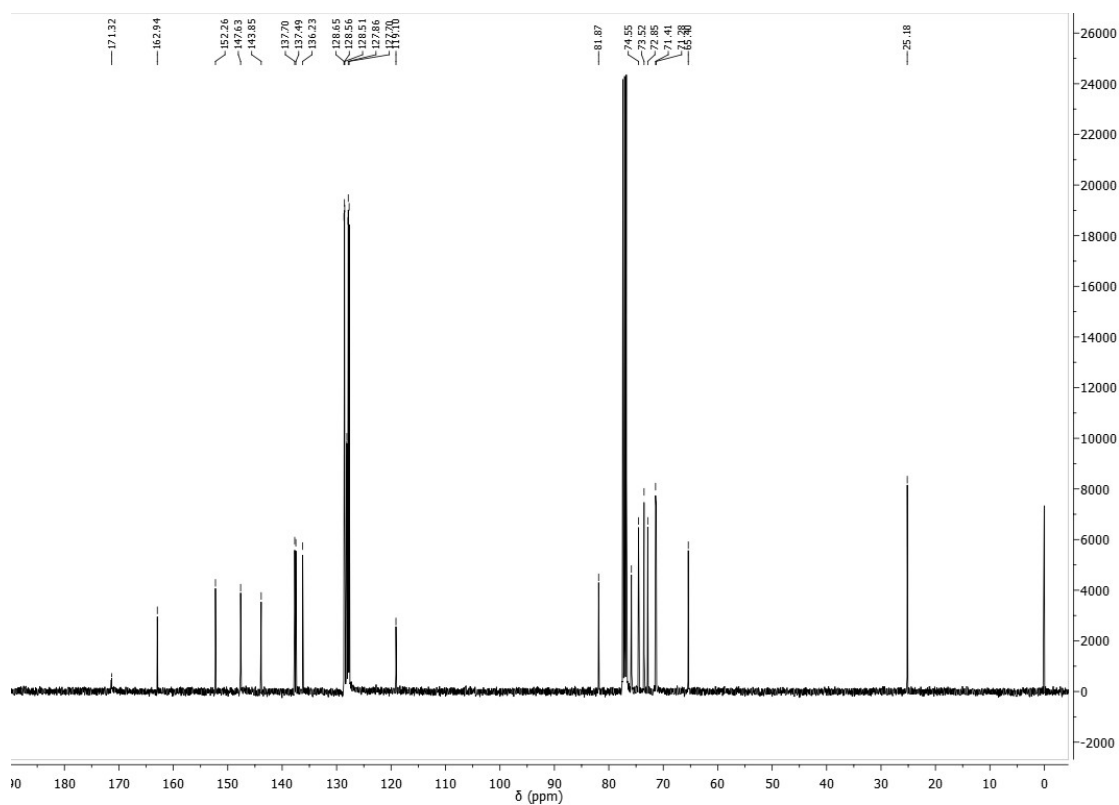

Figure S44. <sup>13</sup>C-NMR spectra of compound **33**

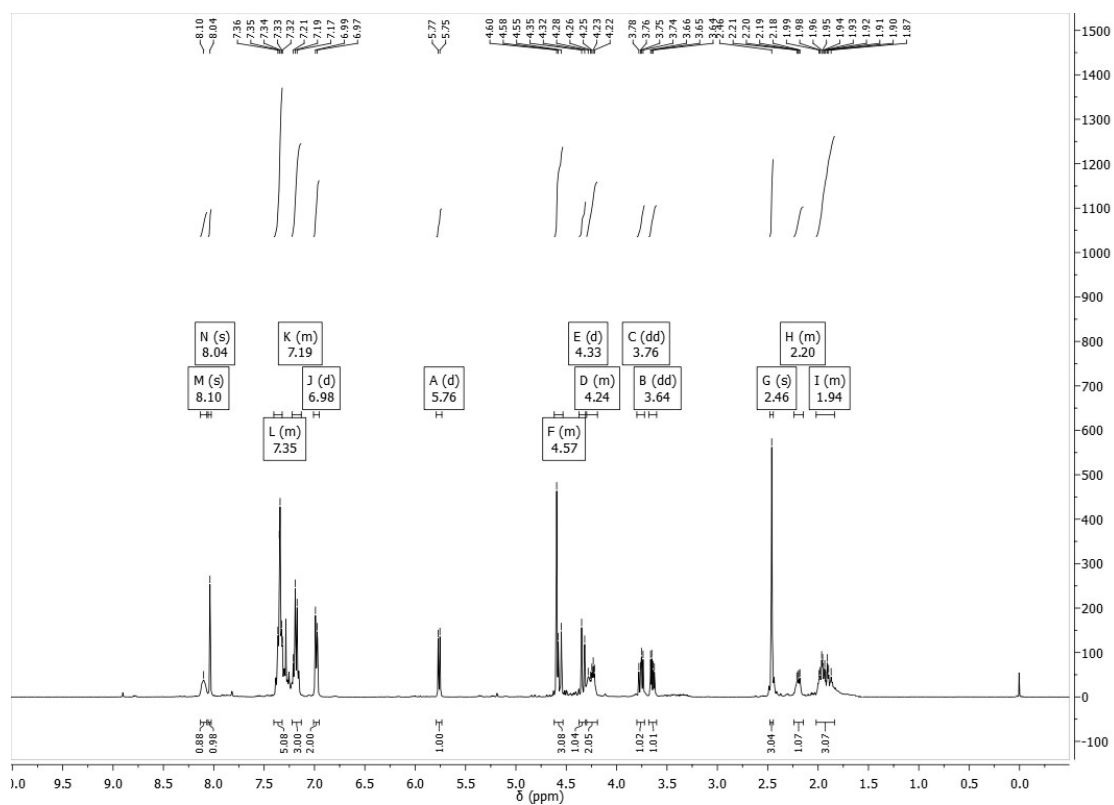

Figure S45. <sup>1</sup>H-NMR spectra of compound **34**

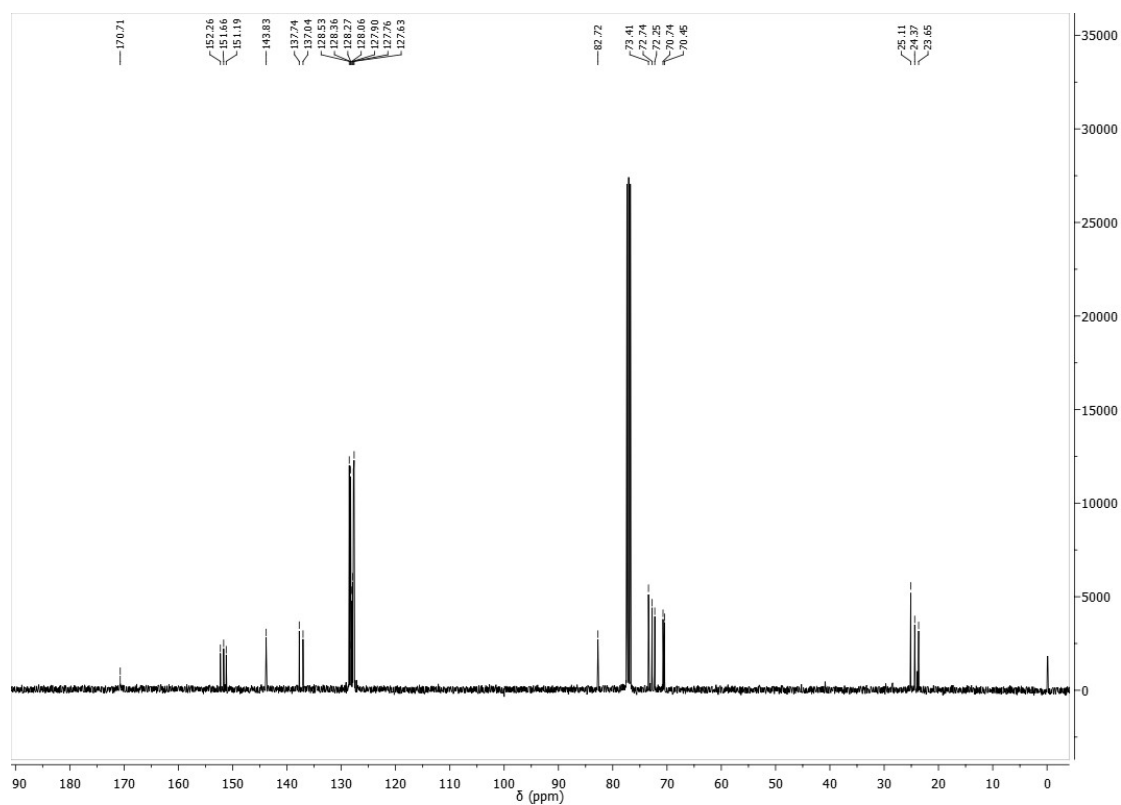

Figure S46. <sup>13</sup>C-NMR spectra of compound **34**

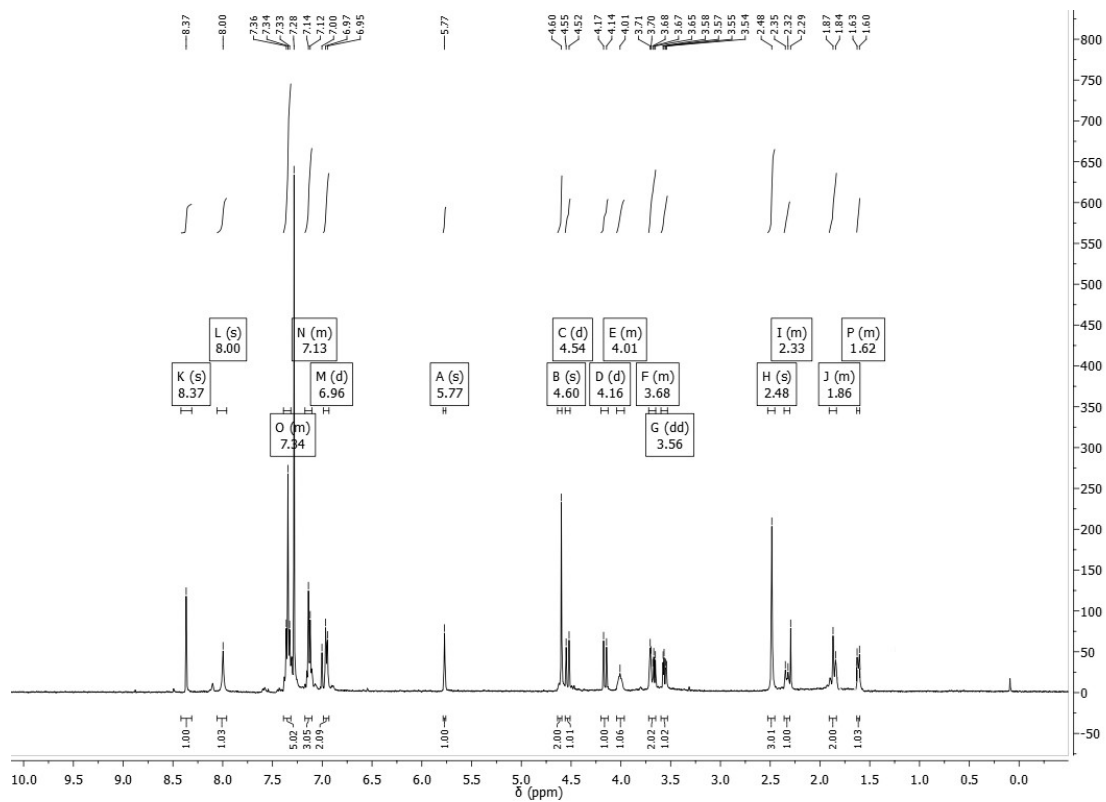

Figure S47.  $^1\text{H}$ -NMR spectra of compound **35**

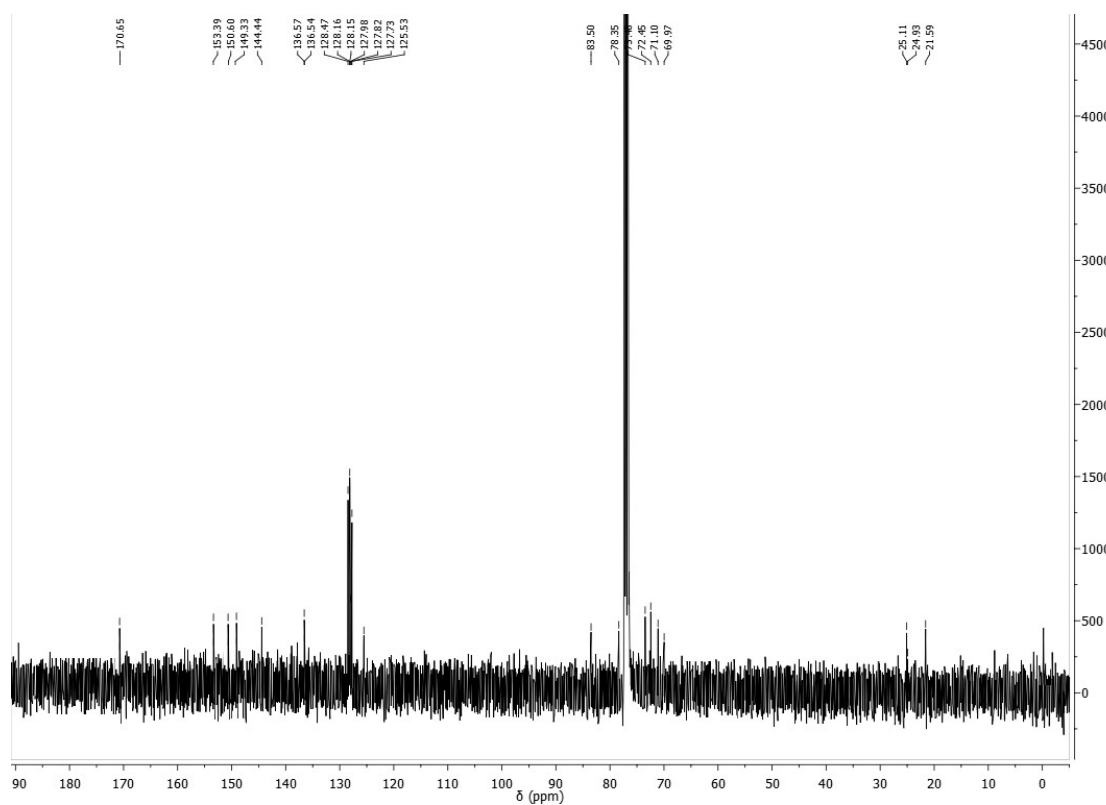

Figure S48.  $^{13}\text{C}$ -NMR spectra of compound **35**



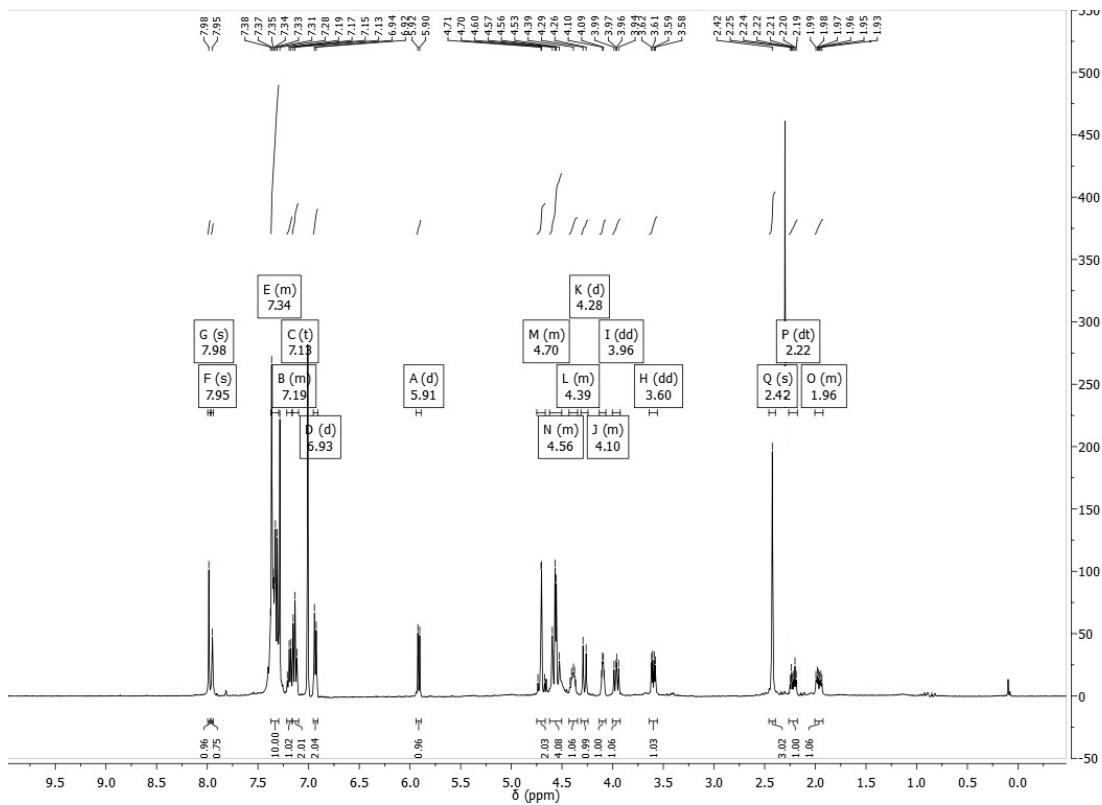

Figure S49. <sup>1</sup>H-NMR spectra of compound **36**

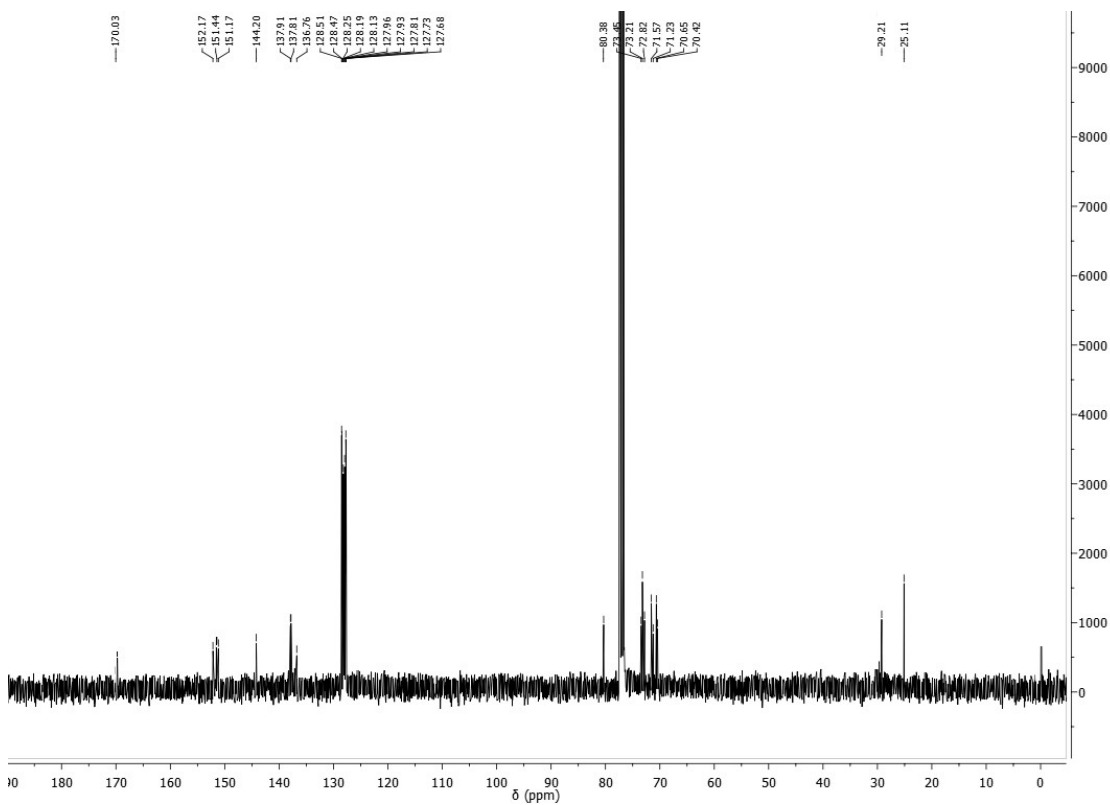

Figure S50. <sup>13</sup>C-NMR spectra of compound **36**

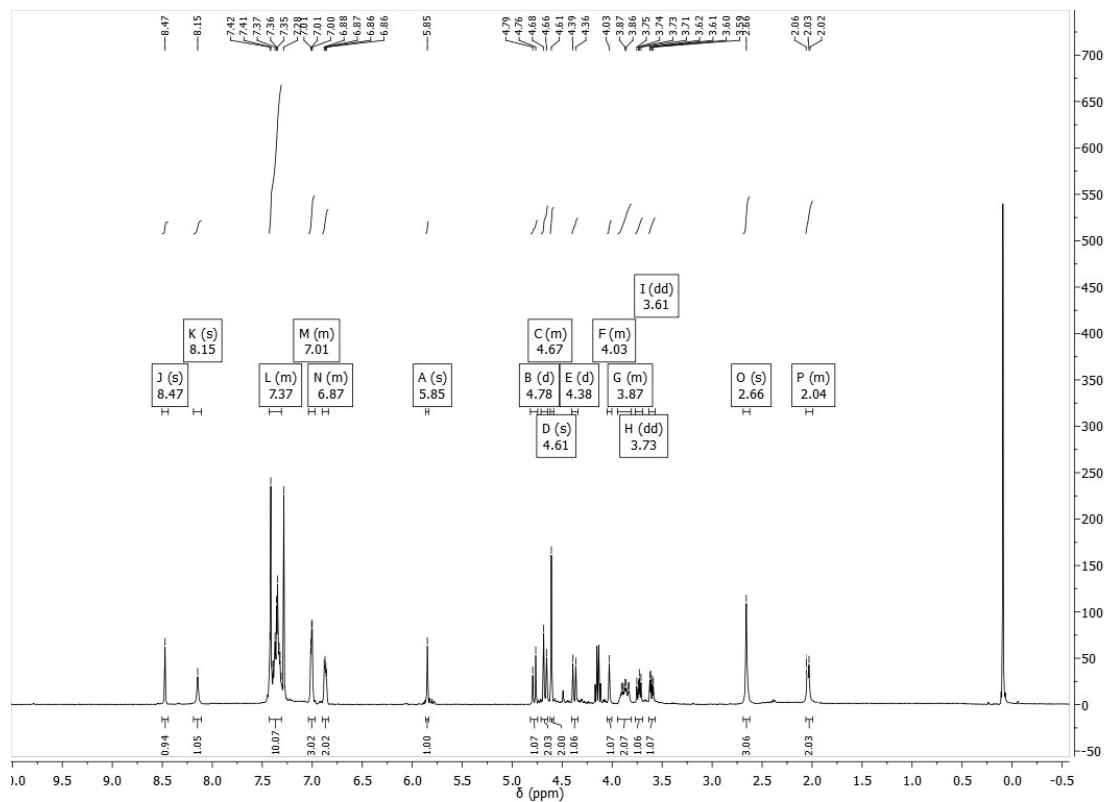

Figure S51.  $^1\text{H}$ -NMR spectra of compound **37**

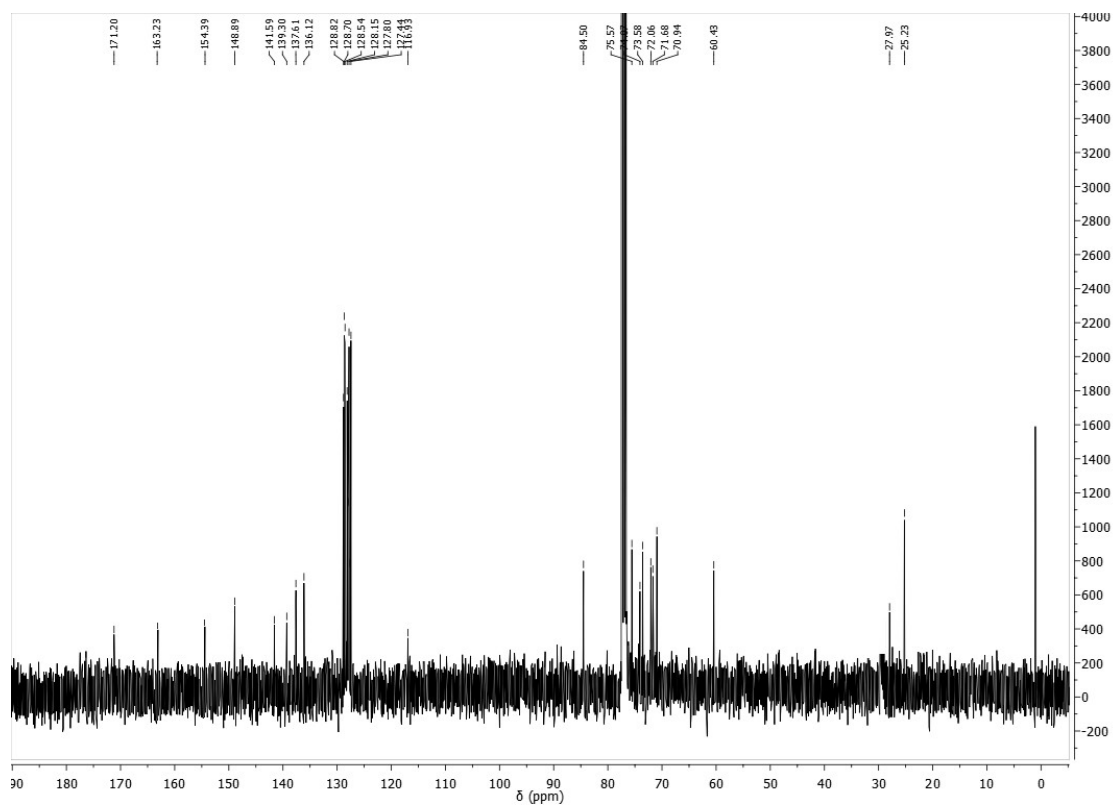

Figure S52.  $^{13}\text{C}$ -NMR spectra of compound **37**
